# Supplementary material
Source: Research Square preprint supplement (doi:10.21203/rs.3.rs-9241751/v1)
Supplement: Supplementary file 1 [file 4f0d953174febe88042e52f5.docx]

SUPPLEMENTARY MATERIALS

| Functional Category | Gene Symbol | Full Gene Name |
| --- | --- | --- |
| Coagulation Cascade | F2 | Coagulation Factor II (Prothrombin) |
|  | F3 | Coagulation Factor III (Tissue Factor) |
|  | F5 | Coagulation Factor V (Labile Factor) |
|  | F7 | Coagulation Factor VII (Stable Factor) |
|  | F8 | Coagulation Factor VIII (Anti-hemophilic Factor A) |
|  | F9 | Coagulation Factor IX (Christmas Factor / Anti-hemophilic Factor B) |
|  | F10 | Coagulation Factor X (Stuart–Prower Factor) |
|  | F11 | Coagulation Factor XI (Plasma Thromboplastin Antecedent) |
|  | F12 | Coagulation Factor XII (Hageman Factor) |
|  | F13A1 | Coagulation Factor XIII A Chain (Fibrin-Stabilizing Factor) |
| Natural Anticoagulant System | PROC | Protein C |
|  | PROS1 | Protein S |
|  | SERPINC1 | Antithrombin III |
|  | THBD | Thrombomodulin |
|  | PROCR | Endothelial Protein C Receptor |
| Fibrinolysis | PLAT | Tissue Plasminogen Activator |
|  | PLG | Plasminogen |
|  | SERPINE1 | Plasminogen Activator Inhibitor-1 |
|  | SERPINF2 | Alpha-2 Antiplasmin |
| Platelet Activation and Adhesion | ITGA2B | Integrin Subunit Alpha 2b |
|  | ITGB3 | Integrin Subunit Beta 3 |
|  | GP1BA | Glycoprotein Ib Platelet Subunit Alpha |
|  | P2RY12 | Purinergic Receptor P2Y12 |
| Endothelial–Thrombosis Regulation | VWF | Von Willebrand Factor |
|  | ADAMTS13 | ADAM Metallopeptidase with Thrombospondin Type 1 Motif 13 |
|  | SELE | E-Selectin |
|  | ICAM1 | Intercellular Adhesion Molecule 1 |

**Sup. Table 1: Classification of the thrombosis-associated genes analyzed in the study**

| Gene Symbol | Full Gene Name |
| --- | --- |
| FLT3 | FMS-Like Tyrosine Kinase 3 |
| NPM1 | Nucleophosmin 1 |
| DNMT3A | DNA Methyltransferase 3 Alpha |
| IDH1 | Isocitrate Dehydrogenase 1 |
| IDH2 | Isocitrate Dehydrogenase 2 |
| RUNX1 | Runt-Related Transcription Factor 1 |
| TET2 | Tet Methylcytosine Dioxygenase 2 |
| ASXL1 | Additional Sex Combs Like 1 |
| ETV6 | ETS Variant Transcription Factor 6 |
| BCORL1 | BCL6 Corepressor Like 1 |
| SETBP1 | SET Binding Protein 1 |
| ZRSR2 | Zinc Finger CCCH-Type, RNA Binding Motif and Serine/Arginine Rich 2 |

**Sup. Table 2: The AML driver genes with the highest frequency in the TCGA –AML patient cohort.**

Top altered genes-

F2
F3
F10
P2RY12
SERPINE1

F2 ████████████ 12%

F3 █████████ 9%

P2RY12 ████████ 8%

F10 █████ 5%

Co-Occurrence and Mutual Exclusivity Result

A B Neither A Not B B Not A Both Log2 Odds Ratio p-Value q-Value Tendency

FLT3 NPM1 85 28 22 31 2.097 <0.001 0.003 Co-occurrence

FLT3 RUNX1 79 56 28 3 -2.726 <0.001 0.023 Mutual exclusivity

NPM1 DNMT3A 92 30 21 23 1.748 0.001 0.027 Co-occurrence

NPM1 RUNX1 85 50 28 3 -2.457 0.003 0.042 Mutual exclusivity

P2RY12 SERPINE1 146 10 6 4 >3 0.005 0.067 Co-occurrence

FLT3 DNMT3A 86 36 21 23 1.388 0.010 0.108 Co-occurrence

F10 FLT3 98 9 59 0 <-3 0.027 0.257 Mutual exclusivity

NPM1 TET2 95 51 18 2 -2.272 0.038 0.288 Mutual exclusivity

DNMT3A IDH1 110 34 12 10 1.431 0.039 0.288 Co-occurrence

F3 F10 143 14 6 3 2.353 0.051 0.338 Co-occurrence

F10 NPM1 104 9 53 0 <-3 0.059 0.352 Mutual exclusivity

IDH2 RUNX1 117 18 23 8 1.177 0.101 0.538 Co-occurrence

F2 F10 137 20 6 3 1.776 0.112 0.538 Co-occurrence

F10 DNMT3A 113 9 44 0 <-3 0.114 0.538 Mutual exclusivity

P2RY12 IDH2 126 14 26 0 <-3 0.130 0.570 Mutual exclusivity

F10 P2RY12 145 7 12 2 1.788 0.169 0.673 Co-occurrence

DNMT3A RUNX1 96 39 26 5 -1.079 0.179 0.673 Mutual exclusivity

FLT3 IDH2 87 53 20 6 -1.022 0.184 0.673 Mutual exclusivity

P2RY12 DNMT3A 114 8 38 6 1.170 0.202 0.703 Co-occurrence

F3 IDH2 127 13 22 4 0.829 0.311 0.926 Co-occurrence

F3 RUNX1 123 12 26 5 0.979 0.320 0.926 Co-occurrence

SERPINE1 FLT3 102 5 54 5 0.918 0.329 0.926 Co-occurrence

NPM1 IDH1 100 44 13 9 0.654 0.336 0.926 Co-occurrence

DNMT3A IDH2 105 35 17 9 0.667 0.337 0.926 Co-occurrence

F2 IDH2 122 18 21 5 0.690 0.366 0.966 Co-occurrence

DNMT3A TET2 109 37 13 7 0.666 0.419 1.000 Co-occurrence

F10 SERPINE1 148 8 9 1 1.040 0.437 1.000 Co-occurrence

F3 IDH1 128 16 21 1 -1.392 0.475 1.000 Mutual exclusivity

F2 FLT3 94 13 49 10 0.561 0.482 1.000 Co-occurrence

F2 TET2 127 19 16 4 0.741 0.486 1.000 Co-occurrence

RUNX1 TET2 120 26 15 5 0.621 0.539 1.000 Co-occurrence

P2RY12 NPM1 102 11 50 3 -0.846 0.552 1.000 Mutual exclusivity

F3 DNMT3A 108 14 41 3 -0.825 0.564 1.000 Mutual exclusivity

F2 RUNX1 115 20 28 3 -0.699 0.574 1.000 Mutual exclusivity

F10 IDH1 135 9 22 0 <-3 0.609 1.000 Mutual exclusivity

SERPINE1 TET2 136 10 20 0 <-3 0.611 1.000 Mutual exclusivity

SERPINE1 IDH1 136 8 20 2 0.766 0.623 1.000 Co-occurrence

FLT3 TET2 93 53 14 6 -0.411 0.629 1.000 Mutual exclusivity

F2 SERPINE1 135 21 8 2 0.684 0.631 1.000 Co-occurrence

NPM1 IDH2 94 46 19 7 -0.410 0.651 1.000 Mutual exclusivity

SERPINE1 RUNX1 126 9 30 1 -1.100 0.690 1.000 Mutual exclusivity

P2RY12 IDH1 131 13 21 1 -1.059 0.696 1.000 Mutual exclusivity

P2RY12 RUNX1 124 11 28 3 0.272 0.727 1.000 Co-occurrence

SERPINE1 NPM1 107 6 49 4 0.542 0.728 1.000 Co-occurrence

IDH1 TET2 127 19 17 3 0.238 0.732 1.000 Co-occurrence

IDH2 TET2 122 24 18 2 -0.824 0.743 1.000 Mutual exclusivity

IDH1 IDH2 122 18 22 4 0.301 0.754 1.000 Co-occurrence

F3 FLT3 95 12 54 5 -0.448 0.790 1.000 Mutual exclusivity

F2 DNMT3A 104 18 39 5 -0.433 0.799 1.000 Mutual exclusivity

F2 NPM1 98 15 45 8 0.216 0.811 1.000 Co-occurrence

FLT3 IDH1 92 52 15 7 -0.276 0.813 1.000 Mutual exclusivity

F2 IDH1 124 20 19 3 -0.031 1.000 1.000 Mutual exclusivity

IDH1 RUNX1 117 18 27 4 -0.054 1.000 1.000 Mutual exclusivity

F2 P2RY12 131 21 12 2 0.056 1.000 1.000 Co-occurrence

P2RY12 TET2 133 13 19 1 -0.893 1.000 1.000 Mutual exclusivity

F2 F3 128 21 15 2 -0.299 1.000 1.000 Mutual exclusivity

SERPINE1 IDH2 131 9 25 1 -0.780 1.000 1.000 Mutual exclusivity

F10 IDH2 132 8 25 1 -0.599 1.000 1.000 Mutual exclusivity

F10 RUNX1 127 8 30 1 -0.918 1.000 1.000 Mutual exclusivity

F3 TET2 131 15 18 2 -0.043 1.000 1.000 Mutual exclusivity

F3 SERPINE1 140 16 9 1 -0.041 1.000 1.000 Mutual exclusivity

SERPINE1 DNMT3A 114 8 42 2 -0.559 1.000 1.000 Mutual exclusivity

F3 P2RY12 136 16 13 1 -0.613 1.000 1.000 Mutual exclusivity

F3 NPM1 101 12 48 5 -0.190 1.000 1.000 Mutual exclusivity

P2RY12 FLT3 98 9 54 5 0.012 1.000 1.000 Co-occurrence

F10 TET2 138 8 19 1 -0.139 1.000 1.000 Mutual exclusivity
