# Supplementary material
Source: Research Square preprint supplement (doi:10.21203/rs.3.rs-9241751/v1)
Supplement: Supplementary file 2 [file 746caa21831475813a9b3263.xlsx]

## Sheet: Sheet1
Study ID	Sample ID	Patient ID	Altered	F2	F3	F10	P2RY12	SERPINE1	FLT3	NPM1	DNMT3A	IDH1	IDH2	RUNX1	TET2	F2: MUT	F2: FUSION	F2: AMP	F2: HOMDEL	F2: EXP>=2	F2: EXP<=-2	F3: MUT	F3: FUSION	F3: AMP	F3: HOMDEL	F3: EXP>=2	F3: EXP<=-2	F10: MUT	F10: FUSION	F10: AMP	F10: HOMDEL	F10: EXP>=2	F10: EXP<=-2	P2RY12: MUT	P2RY12: FUSION	P2RY12: AMP	P2RY12: HOMDEL	P2RY12: EXP>=2	P2RY12: EXP<=-2	SERPINE1: MUT	SERPINE1: FUSION	SERPINE1: AMP	SERPINE1: HOMDEL	SERPINE1: EXP>=2	SERPINE1: EXP<=-2	FLT3: MUT	FLT3: FUSION	FLT3: AMP	FLT3: HOMDEL
laml_tcga_pan_can_atlas_2018	TCGA-AB-2802-03	TCGA-AB-2802	1	no alteration	no alteration	no alteration	no alteration	no alteration	no alteration	I269Efs*14, N270Qfs*11	R882C (driver)	R132H (driver)	no alteration	no alteration	no alteration	no alteration	no alteration	not profiled	not profiled	not profiled	not profiled	no alteration	no alteration	not profiled	not profiled	not profiled	not profiled	no alteration	no alteration	not profiled	not profiled	not profiled	not profiled	no alteration	no alteration	not profiled	not profiled	not profiled	not profiled	no alteration	no alteration	not profiled	not profiled	not profiled	not profiled	no alteration	no alteration	not profiled	not profiled
laml_tcga_pan_can_atlas_2018	TCGA-AB-2803-03	TCGA-AB-2803	1	no alteration	no alteration	no alteration	LOW	HIGH	no alteration	no alteration	no alteration	HIGH	no alteration	no alteration	no alteration	no alteration	no alteration	no alteration	no alteration	no alteration	no alteration	no alteration	no alteration	no alteration	no alteration	no alteration	no alteration	no alteration	no alteration	no alteration	no alteration	no alteration	no alteration	no alteration	no alteration	no alteration	no alteration	LOW	LOW	no alteration	no alteration	no alteration	no alteration	HIGH	HIGH	no alteration	no alteration	no alteration	no alteration
laml_tcga_pan_can_atlas_2018	TCGA-AB-2805-03	TCGA-AB-2805	1	LOW	no alteration	no alteration	no alteration	no alteration	no alteration	no alteration	LOW	no alteration	R140Q (driver)	A142Gfs*2 (driver), R201* (driver)	no alteration	no alteration	no alteration	no alteration	no alteration	LOW	LOW	no alteration	no alteration	no alteration	no alteration	no alteration	no alteration	no alteration	no alteration	no alteration	no alteration	no alteration	no alteration	no alteration	no alteration	no alteration	no alteration	no alteration	no alteration	no alteration	no alteration	no alteration	no alteration	no alteration	no alteration	no alteration	no alteration	no alteration	no alteration
laml_tcga_pan_can_atlas_2018	TCGA-AB-2807-03	TCGA-AB-2807	1	no alteration	no alteration	no alteration	no alteration	no alteration	no alteration	no alteration	no alteration	no alteration	R140Q (driver)	S167_G168del	no alteration	no alteration	no alteration	no alteration	no alteration	no alteration	no alteration	no alteration	no alteration	no alteration	no alteration	no alteration	no alteration	no alteration	no alteration	no alteration	no alteration	no alteration	no alteration	no alteration	no alteration	no alteration	no alteration	no alteration	no alteration	no alteration	no alteration	no alteration	no alteration	no alteration	no alteration	no alteration	no alteration	no alteration	no alteration
laml_tcga_pan_can_atlas_2018	TCGA-AB-2808-03	TCGA-AB-2808	1	no alteration	LOW	no alteration	no alteration	no alteration	no alteration	no alteration	no alteration	no alteration	no alteration	no alteration	no alteration	no alteration	no alteration	no alteration	no alteration	no alteration	no alteration	no alteration	no alteration	no alteration	no alteration	LOW	LOW	no alteration	no alteration	no alteration	no alteration	no alteration	no alteration	no alteration	no alteration	no alteration	no alteration	no alteration	no alteration	no alteration	no alteration	no alteration	no alteration	no alteration	no alteration	no alteration	no alteration	no alteration	no alteration
laml_tcga_pan_can_atlas_2018	TCGA-AB-2809-03	TCGA-AB-2809	1	no alteration	no alteration	no alteration	no alteration	no alteration	no alteration	W288Cfs*12 (driver)	R882H (driver)	no alteration	no alteration	no alteration	no alteration	no alteration	no alteration	no alteration	no alteration	not profiled	not profiled	no alteration	no alteration	no alteration	no alteration	not profiled	not profiled	no alteration	no alteration	no alteration	no alteration	not profiled	not profiled	no alteration	no alteration	no alteration	no alteration	not profiled	not profiled	no alteration	no alteration	no alteration	no alteration	not profiled	not profiled	no alteration	no alteration	no alteration	no alteration
laml_tcga_pan_can_atlas_2018	TCGA-AB-2810-03	TCGA-AB-2810	1	no alteration	no alteration	no alteration	no alteration	no alteration	no alteration	W288Cfs*12 (driver)	no alteration	LOW	R140Q (driver), HIGH	no alteration	no alteration	no alteration	no alteration	no alteration	no alteration	no alteration	no alteration	no alteration	no alteration	no alteration	no alteration	no alteration	no alteration	no alteration	no alteration	no alteration	no alteration	no alteration	no alteration	no alteration	no alteration	no alteration	no alteration	no alteration	no alteration	no alteration	no alteration	no alteration	no alteration	no alteration	no alteration	no alteration	no alteration	no alteration	no alteration
laml_tcga_pan_can_atlas_2018	TCGA-AB-2811-03	TCGA-AB-2811	1	no alteration	no alteration	no alteration	LOW	no alteration	D835Y (driver)	W288Cfs*12 (driver)	R882H (driver)	no alteration	no alteration	no alteration	no alteration	no alteration	no alteration	no alteration	no alteration	no alteration	no alteration	no alteration	no alteration	no alteration	no alteration	no alteration	no alteration	no alteration	no alteration	no alteration	no alteration	no alteration	no alteration	no alteration	no alteration	no alteration	no alteration	LOW	LOW	no alteration	no alteration	no alteration	no alteration	no alteration	no alteration	D835Y (driver)	no alteration	no alteration	no alteration
laml_tcga_pan_can_atlas_2018	TCGA-AB-2812-03	TCGA-AB-2812	1	no alteration	no alteration	no alteration	no alteration	no alteration	S584_D600dup (driver)	W288Cfs*12 (driver)	no alteration	no alteration	no alteration	no alteration	no alteration	no alteration	no alteration	no alteration	no alteration	no alteration	no alteration	no alteration	no alteration	no alteration	no alteration	no alteration	no alteration	no alteration	no alteration	no alteration	no alteration	no alteration	no alteration	no alteration	no alteration	no alteration	no alteration	no alteration	no alteration	no alteration	no alteration	no alteration	no alteration	no alteration	no alteration	S584_D600dup (driver)	no alteration	no alteration	no alteration
laml_tcga_pan_can_atlas_2018	TCGA-AB-2813-03	TCGA-AB-2813	1	no alteration	no alteration	no alteration	no alteration	no alteration	no alteration	LOW	no alteration	no alteration	no alteration	no alteration	no alteration	no alteration	no alteration	no alteration	no alteration	no alteration	no alteration	no alteration	no alteration	no alteration	no alteration	no alteration	no alteration	no alteration	no alteration	no alteration	no alteration	no alteration	no alteration	no alteration	no alteration	no alteration	no alteration	no alteration	no alteration	no alteration	no alteration	no alteration	no alteration	no alteration	no alteration	no alteration	no alteration	no alteration	no alteration
laml_tcga_pan_can_atlas_2018	TCGA-AB-2814-03	TCGA-AB-2814	1	no alteration	no alteration	no alteration	no alteration	no alteration	D835E (driver)	no alteration	no alteration	no alteration	no alteration	no alteration	no alteration	no alteration	no alteration	no alteration	no alteration	no alteration	no alteration	no alteration	no alteration	no alteration	no alteration	no alteration	no alteration	no alteration	no alteration	no alteration	no alteration	no alteration	no alteration	no alteration	no alteration	no alteration	no alteration	no alteration	no alteration	no alteration	no alteration	no alteration	no alteration	no alteration	no alteration	D835E (driver)	no alteration	no alteration	no alteration
laml_tcga_pan_can_atlas_2018	TCGA-AB-2816-03	TCGA-AB-2816	1	LOW	no alteration	no alteration	no alteration	no alteration	D835Y (driver)	W288Cfs*12 (driver)	R882C (driver), LOW	no alteration	LOW	no alteration	no alteration	no alteration	no alteration	no alteration	no alteration	LOW	LOW	no alteration	no alteration	no alteration	no alteration	no alteration	no alteration	no alteration	no alteration	no alteration	no alteration	no alteration	no alteration	no alteration	no alteration	no alteration	no alteration	no alteration	no alteration	no alteration	no alteration	no alteration	no alteration	no alteration	no alteration	D835Y (driver)	no alteration	no alteration	no alteration
laml_tcga_pan_can_atlas_2018	TCGA-AB-2818-03	TCGA-AB-2818	1	no alteration	no alteration	no alteration	no alteration	no alteration	D835Y (driver)	W288Cfs*12 (driver)	R803S (driver)	no alteration	LOW	no alteration	no alteration	no alteration	no alteration	no alteration	no alteration	no alteration	no alteration	no alteration	no alteration	no alteration	no alteration	no alteration	no alteration	no alteration	no alteration	no alteration	no alteration	no alteration	no alteration	no alteration	no alteration	no alteration	no alteration	no alteration	no alteration	no alteration	no alteration	no alteration	no alteration	no alteration	no alteration	D835Y (driver)	no alteration	no alteration	no alteration
laml_tcga_pan_can_atlas_2018	TCGA-AB-2819-03	TCGA-AB-2819	1	no alteration	no alteration	no alteration	no alteration	LOW	no alteration	HIGH	no alteration	no alteration	no alteration	RUNX1-RUNX1T1 fusion	no alteration	no alteration	no alteration	no alteration	no alteration	no alteration	no alteration	no alteration	no alteration	no alteration	no alteration	no alteration	no alteration	no alteration	no alteration	no alteration	no alteration	no alteration	no alteration	no alteration	no alteration	no alteration	no alteration	no alteration	no alteration	no alteration	no alteration	no alteration	no alteration	LOW	LOW	no alteration	no alteration	no alteration	no alteration
laml_tcga_pan_can_atlas_2018	TCGA-AB-2820-03	TCGA-AB-2820	1	no alteration	no alteration	HIGH	no alteration	no alteration	no alteration	no alteration	no alteration	no alteration	LOW	no alteration	no alteration	no alteration	no alteration	no alteration	no alteration	no alteration	no alteration	no alteration	no alteration	no alteration	no alteration	no alteration	no alteration	no alteration	no alteration	no alteration	no alteration	HIGH	HIGH	no alteration	no alteration	no alteration	no alteration	no alteration	no alteration	no alteration	no alteration	no alteration	no alteration	no alteration	no alteration	no alteration	no alteration	no alteration	no alteration
laml_tcga_pan_can_atlas_2018	TCGA-AB-2821-03	TCGA-AB-2821	1	no alteration	no alteration	no alteration	no alteration	no alteration	no alteration	no alteration	no alteration	R132C (driver)	R172K (driver)	D123Gfs*11 (driver)	no alteration	no alteration	no alteration	no alteration	no alteration	no alteration	no alteration	no alteration	no alteration	no alteration	no alteration	no alteration	no alteration	no alteration	no alteration	no alteration	no alteration	no alteration	no alteration	no alteration	no alteration	no alteration	no alteration	no alteration	no alteration	no alteration	no alteration	no alteration	no alteration	no alteration	no alteration	no alteration	no alteration	no alteration	no alteration
laml_tcga_pan_can_atlas_2018	TCGA-AB-2822-03	TCGA-AB-2822	1	no alteration	no alteration	no alteration	no alteration	no alteration	no alteration	no alteration	X556_splice (driver)	R132C (driver)	no alteration	no alteration	Q317Rfs*30 (driver)	no alteration	no alteration	no alteration	no alteration	no alteration	no alteration	no alteration	no alteration	no alteration	no alteration	no alteration	no alteration	no alteration	no alteration	no alteration	no alteration	no alteration	no alteration	no alteration	no alteration	no alteration	no alteration	no alteration	no alteration	no alteration	no alteration	no alteration	no alteration	no alteration	no alteration	no alteration	no alteration	no alteration	no alteration
laml_tcga_pan_can_atlas_2018	TCGA-AB-2824-03	TCGA-AB-2824	1	no alteration	no alteration	no alteration	no alteration	no alteration	no alteration	W288Cfs*12 (driver)	R736H (driver)	no alteration	no alteration	no alteration	no alteration	no alteration	no alteration	no alteration	no alteration	no alteration	no alteration	no alteration	no alteration	no alteration	no alteration	no alteration	no alteration	no alteration	no alteration	no alteration	no alteration	no alteration	no alteration	no alteration	no alteration	no alteration	no alteration	no alteration	no alteration	no alteration	no alteration	no alteration	no alteration	no alteration	no alteration	no alteration	no alteration	no alteration	no alteration
laml_tcga_pan_can_atlas_2018	TCGA-AB-2825-03	TCGA-AB-2825	1	LOW	no alteration	no alteration	no alteration	no alteration	X613_splice	W288Cfs*12 (driver)	R882H (driver)	HIGH	no alteration	no alteration	no alteration	no alteration	no alteration	no alteration	no alteration	LOW	LOW	no alteration	no alteration	no alteration	no alteration	no alteration	no alteration	no alteration	no alteration	no alteration	no alteration	no alteration	no alteration	no alteration	no alteration	no alteration	no alteration	no alteration	no alteration	no alteration	no alteration	no alteration	no alteration	no alteration	no alteration	X613_splice	no alteration	no alteration	no alteration
laml_tcga_pan_can_atlas_2018	TCGA-AB-2826-03	TCGA-AB-2826	1	no alteration	no alteration	no alteration	no alteration	no alteration	no alteration	W288Cfs*12 (driver)	no alteration	no alteration	R140Q (driver)	no alteration	no alteration	no alteration	no alteration	no alteration	no alteration	no alteration	no alteration	no alteration	no alteration	no alteration	no alteration	no alteration	no alteration	no alteration	no alteration	no alteration	no alteration	no alteration	no alteration	no alteration	no alteration	no alteration	no alteration	no alteration	no alteration	no alteration	no alteration	no alteration	no alteration	no alteration	no alteration	no alteration	no alteration	no alteration	no alteration
laml_tcga_pan_can_atlas_2018	TCGA-AB-2830-03	TCGA-AB-2830	1	no alteration	no alteration	no alteration	no alteration	no alteration	E604_F605insSPRGGNEYFYVDFREYEYDLKWE (driver)	no alteration	R882P (driver)	no alteration	no alteration	no alteration	A1381Gfs*20 (driver), K1439Nfs*9 (driver)	no alteration	no alteration	no alteration	no alteration	no alteration	no alteration	no alteration	no alteration	no alteration	no alteration	no alteration	no alteration	no alteration	no alteration	no alteration	no alteration	no alteration	no alteration	no alteration	no alteration	no alteration	no alteration	no alteration	no alteration	no alteration	no alteration	no alteration	no alteration	no alteration	no alteration	E604_F605insSPRGGNEYFYVDFREYEYDLKWE (driver)	no alteration	no alteration	no alteration
laml_tcga_pan_can_atlas_2018	TCGA-AB-2833-03	TCGA-AB-2833	1	no alteration	no alteration	no alteration	no alteration	no alteration	no alteration	no alteration	R882H (driver)	no alteration	no alteration	no alteration	no alteration	no alteration	no alteration	not profiled	not profiled	no alteration	no alteration	no alteration	no alteration	not profiled	not profiled	no alteration	no alteration	no alteration	no alteration	not profiled	not profiled	no alteration	no alteration	no alteration	no alteration	not profiled	not profiled	no alteration	no alteration	no alteration	no alteration	not profiled	not profiled	no alteration	no alteration	no alteration	no alteration	not profiled	not profiled
laml_tcga_pan_can_atlas_2018	TCGA-AB-2834-03	TCGA-AB-2834	1	no alteration	no alteration	no alteration	no alteration	no alteration	D835E (driver)	no alteration	no alteration	no alteration	no alteration	no alteration	no alteration	no alteration	no alteration	no alteration	no alteration	no alteration	no alteration	no alteration	no alteration	no alteration	no alteration	no alteration	no alteration	no alteration	no alteration	no alteration	no alteration	no alteration	no alteration	no alteration	no alteration	no alteration	no alteration	no alteration	no alteration	no alteration	no alteration	no alteration	no alteration	no alteration	no alteration	D835E (driver)	no alteration	no alteration	no alteration
laml_tcga_pan_can_atlas_2018	TCGA-AB-2835-03	TCGA-AB-2835	1	LOW	no alteration	no alteration	no alteration	no alteration	no alteration	W288Cfs*12 (driver)	no alteration	no alteration	no alteration	no alteration	no alteration	no alteration	no alteration	no alteration	no alteration	LOW	LOW	no alteration	no alteration	no alteration	no alteration	no alteration	no alteration	no alteration	no alteration	no alteration	no alteration	no alteration	no alteration	no alteration	no alteration	no alteration	no alteration	no alteration	no alteration	no alteration	no alteration	no alteration	no alteration	no alteration	no alteration	no alteration	no alteration	no alteration	no alteration
laml_tcga_pan_can_atlas_2018	TCGA-AB-2836-03	TCGA-AB-2836	1	no alteration	no alteration	no alteration	no alteration	no alteration	D586_E596dup (driver)	W288Cfs*12 (driver)	no alteration	no alteration	no alteration	no alteration	no alteration	no alteration	no alteration	no alteration	no alteration	no alteration	no alteration	no alteration	no alteration	no alteration	no alteration	no alteration	no alteration	no alteration	no alteration	no alteration	no alteration	no alteration	no alteration	no alteration	no alteration	no alteration	no alteration	no alteration	no alteration	no alteration	no alteration	no alteration	no alteration	no alteration	no alteration	D586_E596dup (driver)	no alteration	no alteration	no alteration
laml_tcga_pan_can_atlas_2018	TCGA-AB-2837-03	TCGA-AB-2837	1	no alteration	no alteration	no alteration	no alteration	no alteration	no alteration	W288Cfs*12 (driver), LOW	no alteration	no alteration	LOW	no alteration	no alteration	no alteration	no alteration	no alteration	no alteration	no alteration	no alteration	no alteration	no alteration	no alteration	no alteration	no alteration	no alteration	no alteration	no alteration	no alteration	no alteration	no alteration	no alteration	no alteration	no alteration	no alteration	no alteration	no alteration	no alteration	no alteration	no alteration	no alteration	no alteration	no alteration	no alteration	no alteration	no alteration	no alteration	no alteration
laml_tcga_pan_can_atlas_2018	TCGA-AB-2838-03	TCGA-AB-2838	1	no alteration	no alteration	no alteration	no alteration	no alteration	LOW	no alteration	no alteration	no alteration	no alteration	no alteration	no alteration	no alteration	no alteration	no alteration	no alteration	no alteration	no alteration	no alteration	no alteration	no alteration	no alteration	no alteration	no alteration	no alteration	no alteration	no alteration	no alteration	no alteration	no alteration	no alteration	no alteration	no alteration	no alteration	no alteration	no alteration	no alteration	no alteration	no alteration	no alteration	no alteration	no alteration	no alteration	no alteration	no alteration	no alteration
laml_tcga_pan_can_atlas_2018	TCGA-AB-2839-03	TCGA-AB-2839	1	no alteration	no alteration	no alteration	no alteration	no alteration	no alteration	W288Cfs*12 (driver)	Q515* (driver)	no alteration	no alteration	no alteration	no alteration	no alteration	no alteration	no alteration	no alteration	no alteration	no alteration	no alteration	no alteration	no alteration	no alteration	no alteration	no alteration	no alteration	no alteration	no alteration	no alteration	no alteration	no alteration	no alteration	no alteration	no alteration	no alteration	no alteration	no alteration	no alteration	no alteration	no alteration	no alteration	no alteration	no alteration	no alteration	no alteration	no alteration	no alteration
laml_tcga_pan_can_atlas_2018	TCGA-AB-2840-03	TCGA-AB-2840	1	no alteration	no alteration	no alteration	no alteration	HIGH	Y597_K602dup (driver)	no alteration	no alteration	no alteration	no alteration	no alteration	no alteration	no alteration	no alteration	no alteration	no alteration	no alteration	no alteration	no alteration	no alteration	no alteration	no alteration	no alteration	no alteration	no alteration	no alteration	no alteration	no alteration	no alteration	no alteration	no alteration	no alteration	no alteration	no alteration	no alteration	no alteration	no alteration	no alteration	no alteration	no alteration	HIGH	HIGH	Y597_K602dup (driver)	no alteration	no alteration	no alteration
laml_tcga_pan_can_atlas_2018	TCGA-AB-2841-03	TCGA-AB-2841	1	no alteration	HIGH	no alteration	no alteration	no alteration	no alteration	LOW	no alteration	no alteration	no alteration	no alteration	no alteration	no alteration	no alteration	no alteration	no alteration	no alteration	no alteration	no alteration	no alteration	no alteration	no alteration	HIGH	HIGH	no alteration	no alteration	no alteration	no alteration	no alteration	no alteration	no alteration	no alteration	no alteration	no alteration	no alteration	no alteration	no alteration	no alteration	no alteration	no alteration	no alteration	no alteration	no alteration	no alteration	no alteration	no alteration
laml_tcga_pan_can_atlas_2018	TCGA-AB-2842-03	TCGA-AB-2842	1	no alteration	no alteration	no alteration	LOW	LOW	no alteration	no alteration	no alteration	no alteration	no alteration	no alteration	no alteration	no alteration	no alteration	no alteration	no alteration	no alteration	no alteration	no alteration	no alteration	no alteration	no alteration	no alteration	no alteration	no alteration	no alteration	no alteration	no alteration	no alteration	no alteration	no alteration	no alteration	no alteration	no alteration	LOW	LOW	no alteration	no alteration	no alteration	no alteration	LOW	LOW	no alteration	no alteration	no alteration	no alteration
laml_tcga_pan_can_atlas_2018	TCGA-AB-2844-03	TCGA-AB-2844	1	no alteration	no alteration	no alteration	no alteration	no alteration	X585_splice	no alteration	no alteration	no alteration	no alteration	no alteration	no alteration	no alteration	no alteration	no alteration	no alteration	no alteration	no alteration	no alteration	no alteration	no alteration	no alteration	no alteration	no alteration	no alteration	no alteration	no alteration	no alteration	no alteration	no alteration	no alteration	no alteration	no alteration	no alteration	no alteration	no alteration	no alteration	no alteration	no alteration	no alteration	no alteration	no alteration	X585_splice	no alteration	no alteration	no alteration
laml_tcga_pan_can_atlas_2018	TCGA-AB-2845-03	TCGA-AB-2845	1	no alteration	no alteration	no alteration	no alteration	no alteration	K663R	no alteration	no alteration	no alteration	no alteration	no alteration	K1308Sfs*55 (driver)	no alteration	no alteration	no alteration	no alteration	no alteration	no alteration	no alteration	no alteration	no alteration	no alteration	no alteration	no alteration	no alteration	no alteration	no alteration	no alteration	no alteration	no alteration	no alteration	no alteration	no alteration	no alteration	no alteration	no alteration	no alteration	no alteration	no alteration	no alteration	no alteration	no alteration	K663R	no alteration	no alteration	no alteration
laml_tcga_pan_can_atlas_2018	TCGA-AB-2848-03	TCGA-AB-2848	1	no alteration	no alteration	no alteration	no alteration	no alteration	no alteration	W288Cfs*12 (driver)	no alteration	no alteration	no alteration	no alteration	no alteration	no alteration	no alteration	no alteration	no alteration	no alteration	no alteration	no alteration	no alteration	no alteration	no alteration	no alteration	no alteration	no alteration	no alteration	no alteration	no alteration	no alteration	no alteration	no alteration	no alteration	no alteration	no alteration	no alteration	no alteration	no alteration	no alteration	no alteration	no alteration	no alteration	no alteration	no alteration	no alteration	no alteration	no alteration
laml_tcga_pan_can_atlas_2018	TCGA-AB-2849-03	TCGA-AB-2849	1	LOW	no alteration	no alteration	no alteration	no alteration	no alteration	no alteration	no alteration	no alteration	no alteration	no alteration	LOW	no alteration	no alteration	no alteration	no alteration	LOW	LOW	no alteration	no alteration	no alteration	no alteration	no alteration	no alteration	no alteration	no alteration	no alteration	no alteration	no alteration	no alteration	no alteration	no alteration	no alteration	no alteration	no alteration	no alteration	no alteration	no alteration	no alteration	no alteration	no alteration	no alteration	no alteration	no alteration	no alteration	no alteration
laml_tcga_pan_can_atlas_2018	TCGA-AB-2850-03	TCGA-AB-2850	1	no alteration	no alteration	no alteration	no alteration	no alteration	no alteration	no alteration	no alteration	no alteration	R140Q (driver)	G420Hfs*172 (driver)	no alteration	no alteration	no alteration	no alteration	no alteration	not profiled	not profiled	no alteration	no alteration	no alteration	no alteration	not profiled	not profiled	no alteration	no alteration	no alteration	no alteration	not profiled	not profiled	no alteration	no alteration	no alteration	no alteration	not profiled	not profiled	no alteration	no alteration	no alteration	no alteration	not profiled	not profiled	no alteration	no alteration	no alteration	no alteration
laml_tcga_pan_can_atlas_2018	TCGA-AB-2851-03	TCGA-AB-2851	1	no alteration	no alteration	no alteration	no alteration	no alteration	D835Y (driver)	no alteration	E616Nfs*35 (driver)	no alteration	no alteration	no alteration	no alteration	no alteration	no alteration	no alteration	no alteration	no alteration	no alteration	no alteration	no alteration	no alteration	no alteration	no alteration	no alteration	no alteration	no alteration	no alteration	no alteration	no alteration	no alteration	no alteration	no alteration	no alteration	no alteration	no alteration	no alteration	no alteration	no alteration	no alteration	no alteration	no alteration	no alteration	D835Y (driver)	no alteration	no alteration	no alteration
laml_tcga_pan_can_atlas_2018	TCGA-AB-2853-03	TCGA-AB-2853	1	no alteration	no alteration	no alteration	LOW	LOW	R595_E596insDYVDFR (driver), PAN3-FLT3 fusion	W288Cfs*12 (driver)	R882H (driver)	no alteration	no alteration	no alteration	no alteration	no alteration	no alteration	no alteration	no alteration	no alteration	no alteration	no alteration	no alteration	no alteration	no alteration	no alteration	no alteration	no alteration	no alteration	no alteration	no alteration	no alteration	no alteration	no alteration	no alteration	no alteration	no alteration	LOW	LOW	no alteration	no alteration	no alteration	no alteration	LOW	LOW	R595_E596insDYVDFR (driver)	PAN3-FLT3 fusion	no alteration	no alteration
laml_tcga_pan_can_atlas_2018	TCGA-AB-2855-03	TCGA-AB-2855	1	no alteration	no alteration	no alteration	no alteration	no alteration	no alteration	no alteration	no alteration	no alteration	no alteration	no alteration	LOW	no alteration	no alteration	no alteration	no alteration	no alteration	no alteration	no alteration	no alteration	no alteration	no alteration	no alteration	no alteration	no alteration	no alteration	no alteration	no alteration	no alteration	no alteration	no alteration	no alteration	no alteration	no alteration	no alteration	no alteration	no alteration	no alteration	no alteration	no alteration	no alteration	no alteration	no alteration	no alteration	no alteration	no alteration
laml_tcga_pan_can_atlas_2018	TCGA-AB-2857-03	TCGA-AB-2857	1	no alteration	no alteration	no alteration	no alteration	no alteration	LOW	no alteration	no alteration	no alteration	no alteration	no alteration	no alteration	no alteration	no alteration	no alteration	no alteration	no alteration	no alteration	no alteration	no alteration	no alteration	no alteration	no alteration	no alteration	no alteration	no alteration	no alteration	no alteration	no alteration	no alteration	no alteration	no alteration	no alteration	no alteration	no alteration	no alteration	no alteration	no alteration	no alteration	no alteration	no alteration	no alteration	no alteration	no alteration	no alteration	no alteration
laml_tcga_pan_can_atlas_2018	TCGA-AB-2858-03	TCGA-AB-2858	1	no alteration	LOW	no alteration	no alteration	no alteration	no alteration	no alteration	no alteration	no alteration	no alteration	RUNX1-RUNX1T1 fusion	no alteration	no alteration	no alteration	no alteration	no alteration	no alteration	no alteration	no alteration	no alteration	no alteration	no alteration	LOW	LOW	no alteration	no alteration	no alteration	no alteration	no alteration	no alteration	no alteration	no alteration	no alteration	no alteration	no alteration	no alteration	no alteration	no alteration	no alteration	no alteration	no alteration	no alteration	no alteration	no alteration	no alteration	no alteration
laml_tcga_pan_can_atlas_2018	TCGA-AB-2859-03	TCGA-AB-2859	1	no alteration	no alteration	no alteration	no alteration	no alteration	N841K (driver), V491L	W288Cfs*12 (driver), W288Lfs*12 (driver)	R882H (driver)	no alteration	no alteration	no alteration	no alteration	no alteration	no alteration	no alteration	no alteration	no alteration	no alteration	no alteration	no alteration	no alteration	no alteration	no alteration	no alteration	no alteration	no alteration	no alteration	no alteration	no alteration	no alteration	no alteration	no alteration	no alteration	no alteration	no alteration	no alteration	no alteration	no alteration	no alteration	no alteration	no alteration	no alteration	N841K (driver), V491L	no alteration	no alteration	no alteration
laml_tcga_pan_can_atlas_2018	TCGA-AB-2861-03	TCGA-AB-2861	1	no alteration	HIGH	no alteration	no alteration	no alteration	no alteration	W288Cfs*12 (driver)	Q615* (driver), LOW	no alteration	no alteration	no alteration	no alteration	no alteration	no alteration	no alteration	no alteration	no alteration	no alteration	no alteration	no alteration	no alteration	no alteration	HIGH	HIGH	no alteration	no alteration	no alteration	no alteration	no alteration	no alteration	no alteration	no alteration	no alteration	no alteration	no alteration	no alteration	no alteration	no alteration	no alteration	no alteration	no alteration	no alteration	no alteration	no alteration	no alteration	no alteration
laml_tcga_pan_can_atlas_2018	TCGA-AB-2862-03	TCGA-AB-2862	1	HIGH	no alteration	no alteration	no alteration	no alteration	no alteration	no alteration	no alteration	no alteration	no alteration	no alteration	no alteration	no alteration	no alteration	no alteration	no alteration	HIGH	HIGH	no alteration	no alteration	no alteration	no alteration	no alteration	no alteration	no alteration	no alteration	no alteration	no alteration	no alteration	no alteration	no alteration	no alteration	no alteration	no alteration	no alteration	no alteration	no alteration	no alteration	no alteration	no alteration	no alteration	no alteration	no alteration	no alteration	no alteration	no alteration
laml_tcga_pan_can_atlas_2018	TCGA-AB-2863-03	TCGA-AB-2863	1	LOW	no alteration	no alteration	no alteration	no alteration	no alteration	no alteration	R882H (driver)	R132C (driver)	no alteration	no alteration	no alteration	no alteration	no alteration	no alteration	no alteration	LOW	LOW	no alteration	no alteration	no alteration	no alteration	no alteration	no alteration	no alteration	no alteration	no alteration	no alteration	no alteration	no alteration	no alteration	no alteration	no alteration	no alteration	no alteration	no alteration	no alteration	no alteration	no alteration	no alteration	no alteration	no alteration	no alteration	no alteration	no alteration	no alteration
laml_tcga_pan_can_atlas_2018	TCGA-AB-2864-03	TCGA-AB-2864	1	no alteration	no alteration	no alteration	no alteration	no alteration	no alteration	no alteration	R882H (driver)	no alteration	R172K (driver)	no alteration	no alteration	no alteration	no alteration	no alteration	no alteration	not profiled	not profiled	no alteration	no alteration	no alteration	no alteration	not profiled	not profiled	no alteration	no alteration	no alteration	no alteration	not profiled	not profiled	no alteration	no alteration	no alteration	no alteration	not profiled	not profiled	no alteration	no alteration	no alteration	no alteration	not profiled	not profiled	no alteration	no alteration	no alteration	no alteration
laml_tcga_pan_can_atlas_2018	TCGA-AB-2865-03	TCGA-AB-2865	1	no alteration	no alteration	no alteration	no alteration	no alteration	no alteration	no alteration	no alteration	no alteration	no alteration	D198N (driver), S141L	K1422Ifs*27 (driver), K1422Ifs*27 (driver), Q947* (driver)	no alteration	no alteration	no alteration	no alteration	no alteration	no alteration	no alteration	no alteration	no alteration	no alteration	no alteration	no alteration	no alteration	no alteration	no alteration	no alteration	no alteration	no alteration	no alteration	no alteration	no alteration	no alteration	no alteration	no alteration	no alteration	no alteration	no alteration	no alteration	no alteration	no alteration	no alteration	no alteration	no alteration	no alteration
laml_tcga_pan_can_atlas_2018	TCGA-AB-2866-03	TCGA-AB-2866	1	no alteration	no alteration	no alteration	no alteration	no alteration	no alteration	no alteration	no alteration	no alteration	R140Q (driver)	no alteration	no alteration	no alteration	no alteration	no alteration	no alteration	no alteration	no alteration	no alteration	no alteration	no alteration	no alteration	no alteration	no alteration	no alteration	no alteration	no alteration	no alteration	no alteration	no alteration	no alteration	no alteration	no alteration	no alteration	no alteration	no alteration	no alteration	no alteration	no alteration	no alteration	no alteration	no alteration	no alteration	no alteration	no alteration	no alteration
laml_tcga_pan_can_atlas_2018	TCGA-AB-2867-03	TCGA-AB-2867	1	no alteration	no alteration	no alteration	no alteration	no alteration	no alteration	no alteration	K829R (driver), K468R	R132C (driver)	no alteration	no alteration	no alteration	no alteration	no alteration	no alteration	no alteration	no alteration	no alteration	no alteration	no alteration	no alteration	no alteration	no alteration	no alteration	no alteration	no alteration	no alteration	no alteration	no alteration	no alteration	no alteration	no alteration	no alteration	no alteration	no alteration	no alteration	no alteration	no alteration	no alteration	no alteration	no alteration	no alteration	no alteration	no alteration	no alteration	no alteration
laml_tcga_pan_can_atlas_2018	TCGA-AB-2868-03	TCGA-AB-2868	1	no alteration	no alteration	no alteration	no alteration	no alteration	no alteration	no alteration	no alteration	no alteration	no alteration	AMP (driver)	no alteration	no alteration	no alteration	no alteration	no alteration	no alteration	no alteration	no alteration	no alteration	no alteration	no alteration	no alteration	no alteration	no alteration	no alteration	no alteration	no alteration	no alteration	no alteration	no alteration	no alteration	no alteration	no alteration	no alteration	no alteration	no alteration	no alteration	no alteration	no alteration	no alteration	no alteration	no alteration	no alteration	no alteration	no alteration
laml_tcga_pan_can_atlas_2018	TCGA-AB-2869-03	TCGA-AB-2869	1	no alteration	no alteration	no alteration	no alteration	no alteration	L601_K602insQMGVSKRKFRVWRI*I*S (driver)	W288Cfs*12 (driver)	Q485* (driver)	no alteration	no alteration	no alteration	no alteration	no alteration	no alteration	no alteration	no alteration	no alteration	no alteration	no alteration	no alteration	no alteration	no alteration	no alteration	no alteration	no alteration	no alteration	no alteration	no alteration	no alteration	no alteration	no alteration	no alteration	no alteration	no alteration	no alteration	no alteration	no alteration	no alteration	no alteration	no alteration	no alteration	no alteration	L601_K602insQMGVSKRKFRVWRI*I*S (driver)	no alteration	no alteration	no alteration
laml_tcga_pan_can_atlas_2018	TCGA-AB-2870-03	TCGA-AB-2870	1	LOW	no alteration	no alteration	no alteration	HIGH	F594_D600delinsSPPPH (driver)	no alteration	no alteration	no alteration	no alteration	no alteration	no alteration	no alteration	no alteration	no alteration	no alteration	LOW	LOW	no alteration	no alteration	no alteration	no alteration	no alteration	no alteration	no alteration	no alteration	no alteration	no alteration	no alteration	no alteration	no alteration	no alteration	no alteration	no alteration	no alteration	no alteration	no alteration	no alteration	no alteration	no alteration	HIGH	HIGH	F594_D600delinsSPPPH (driver)	no alteration	no alteration	no alteration
laml_tcga_pan_can_atlas_2018	TCGA-AB-2871-03	TCGA-AB-2871	1	no alteration	no alteration	no alteration	no alteration	no alteration	M578_E598dup (driver)	W288Cfs*12 (driver)	no alteration	no alteration	no alteration	no alteration	no alteration	no alteration	no alteration	no alteration	no alteration	no alteration	no alteration	no alteration	no alteration	no alteration	no alteration	no alteration	no alteration	no alteration	no alteration	no alteration	no alteration	no alteration	no alteration	no alteration	no alteration	no alteration	no alteration	no alteration	no alteration	no alteration	no alteration	no alteration	no alteration	no alteration	no alteration	M578_E598dup (driver)	no alteration	no alteration	no alteration
laml_tcga_pan_can_atlas_2018	TCGA-AB-2872-03	TCGA-AB-2872	1	no alteration	no alteration	no alteration	LOW	no alteration	no alteration	no alteration	no alteration	no alteration	no alteration	no alteration	no alteration	no alteration	no alteration	no alteration	no alteration	no alteration	no alteration	no alteration	no alteration	no alteration	no alteration	no alteration	no alteration	no alteration	no alteration	no alteration	no alteration	no alteration	no alteration	no alteration	no alteration	no alteration	no alteration	LOW	LOW	no alteration	no alteration	no alteration	no alteration	no alteration	no alteration	no alteration	no alteration	no alteration	no alteration
laml_tcga_pan_can_atlas_2018	TCGA-AB-2873-03	TCGA-AB-2873	1	no alteration	no alteration	no alteration	HIGH	no alteration	no alteration	no alteration	R882H (driver)	no alteration	no alteration	no alteration	H880Tfs*41 (driver)	no alteration	no alteration	no alteration	no alteration	no alteration	no alteration	no alteration	no alteration	no alteration	no alteration	no alteration	no alteration	no alteration	no alteration	no alteration	no alteration	no alteration	no alteration	no alteration	no alteration	no alteration	no alteration	HIGH	HIGH	no alteration	no alteration	no alteration	no alteration	no alteration	no alteration	no alteration	no alteration	no alteration	no alteration
laml_tcga_pan_can_atlas_2018	TCGA-AB-2874-03	TCGA-AB-2874	1	no alteration	no alteration	no alteration	no alteration	no alteration	no alteration	no alteration	no alteration	no alteration	R140Q (driver)	no alteration	no alteration	no alteration	no alteration	no alteration	no alteration	no alteration	no alteration	no alteration	no alteration	no alteration	no alteration	no alteration	no alteration	no alteration	no alteration	no alteration	no alteration	no alteration	no alteration	no alteration	no alteration	no alteration	no alteration	no alteration	no alteration	no alteration	no alteration	no alteration	no alteration	no alteration	no alteration	no alteration	no alteration	no alteration	no alteration
laml_tcga_pan_can_atlas_2018	TCGA-AB-2875-03	TCGA-AB-2875	1	no alteration	LOW	no alteration	no alteration	no alteration	E598_Y599insVAYVDFREYE (driver)	no alteration	no alteration	no alteration	no alteration	RUNX1-RUNX1T1 fusion	no alteration	no alteration	no alteration	no alteration	no alteration	no alteration	no alteration	no alteration	no alteration	no alteration	no alteration	LOW	LOW	no alteration	no alteration	no alteration	no alteration	no alteration	no alteration	no alteration	no alteration	no alteration	no alteration	no alteration	no alteration	no alteration	no alteration	no alteration	no alteration	no alteration	no alteration	E598_Y599insVAYVDFREYE (driver)	no alteration	no alteration	no alteration
laml_tcga_pan_can_atlas_2018	TCGA-AB-2876-03	TCGA-AB-2876	1	no alteration	no alteration	no alteration	no alteration	no alteration	no alteration	no alteration	no alteration	no alteration	no alteration	no alteration	Q481* (driver)	no alteration	no alteration	not profiled	not profiled	not profiled	not profiled	no alteration	no alteration	not profiled	not profiled	not profiled	not profiled	no alteration	no alteration	not profiled	not profiled	not profiled	not profiled	no alteration	no alteration	not profiled	not profiled	not profiled	not profiled	no alteration	no alteration	not profiled	not profiled	not profiled	not profiled	no alteration	no alteration	not profiled	not profiled
laml_tcga_pan_can_atlas_2018	TCGA-AB-2877-03	TCGA-AB-2877	1	LOW	HIGH	no alteration	no alteration	HIGH	Y599_E604dup (driver)	W288Cfs*12 (driver)	no alteration	no alteration	R140Q (driver)	no alteration	no alteration	no alteration	no alteration	no alteration	no alteration	LOW	LOW	no alteration	no alteration	no alteration	no alteration	HIGH	HIGH	no alteration	no alteration	no alteration	no alteration	no alteration	no alteration	no alteration	no alteration	no alteration	no alteration	no alteration	no alteration	no alteration	no alteration	no alteration	no alteration	HIGH	HIGH	Y599_E604dup (driver)	no alteration	no alteration	no alteration
laml_tcga_pan_can_atlas_2018	TCGA-AB-2879-03	TCGA-AB-2879	1	no alteration	no alteration	no alteration	no alteration	no alteration	L601_K602insNVDFREYEYDL (driver)	W288Cfs*12 (driver)	no alteration	no alteration	no alteration	no alteration	N275Ifs*18 (driver), R1216* (driver)	no alteration	no alteration	no alteration	no alteration	no alteration	no alteration	no alteration	no alteration	no alteration	no alteration	no alteration	no alteration	no alteration	no alteration	no alteration	no alteration	no alteration	no alteration	no alteration	no alteration	no alteration	no alteration	no alteration	no alteration	no alteration	no alteration	no alteration	no alteration	no alteration	no alteration	L601_K602insNVDFREYEYDL (driver)	no alteration	no alteration	no alteration
laml_tcga_pan_can_atlas_2018	TCGA-AB-2880-03	TCGA-AB-2880	1	no alteration	LOW	no alteration	no alteration	no alteration	R595_L601dup (driver)	no alteration	no alteration	no alteration	no alteration	no alteration	no alteration	no alteration	no alteration	no alteration	no alteration	no alteration	no alteration	no alteration	no alteration	no alteration	no alteration	LOW	LOW	no alteration	no alteration	no alteration	no alteration	no alteration	no alteration	no alteration	no alteration	no alteration	no alteration	no alteration	no alteration	no alteration	no alteration	no alteration	no alteration	no alteration	no alteration	R595_L601dup (driver)	no alteration	no alteration	no alteration
laml_tcga_pan_can_atlas_2018	TCGA-AB-2882-03	TCGA-AB-2882	1	no alteration	no alteration	no alteration	no alteration	no alteration	LOW	no alteration	no alteration	LOW	no alteration	no alteration	no alteration	no alteration	no alteration	no alteration	no alteration	no alteration	no alteration	no alteration	no alteration	no alteration	no alteration	no alteration	no alteration	no alteration	no alteration	no alteration	no alteration	no alteration	no alteration	no alteration	no alteration	no alteration	no alteration	no alteration	no alteration	no alteration	no alteration	no alteration	no alteration	no alteration	no alteration	no alteration	no alteration	no alteration	no alteration
laml_tcga_pan_can_atlas_2018	TCGA-AB-2884-03	TCGA-AB-2884	1	no alteration	no alteration	no alteration	no alteration	no alteration	no alteration	W288Cfs*12 (driver)	R882H (driver)	R132H (driver)	no alteration	no alteration	no alteration	no alteration	no alteration	no alteration	no alteration	no alteration	no alteration	no alteration	no alteration	no alteration	no alteration	no alteration	no alteration	no alteration	no alteration	no alteration	no alteration	no alteration	no alteration	no alteration	no alteration	no alteration	no alteration	no alteration	no alteration	no alteration	no alteration	no alteration	no alteration	no alteration	no alteration	no alteration	no alteration	no alteration	no alteration
laml_tcga_pan_can_atlas_2018	TCGA-AB-2885-03	TCGA-AB-2885	1	LOW	no alteration	HIGH	no alteration	no alteration	no alteration	no alteration	no alteration	no alteration	no alteration	no alteration	no alteration	no alteration	no alteration	no alteration	no alteration	LOW	LOW	no alteration	no alteration	no alteration	no alteration	no alteration	no alteration	no alteration	no alteration	no alteration	no alteration	HIGH	HIGH	no alteration	no alteration	no alteration	no alteration	no alteration	no alteration	no alteration	no alteration	no alteration	no alteration	no alteration	no alteration	no alteration	no alteration	no alteration	no alteration
laml_tcga_pan_can_atlas_2018	TCGA-AB-2886-03	TCGA-AB-2886	1	no alteration	no alteration	no alteration	LOW	no alteration	no alteration	no alteration	HIGH	no alteration	no alteration	RUNX1-RUNX1T1 fusion	no alteration	no alteration	no alteration	no alteration	no alteration	no alteration	no alteration	no alteration	no alteration	no alteration	no alteration	no alteration	no alteration	no alteration	no alteration	no alteration	no alteration	no alteration	no alteration	no alteration	no alteration	no alteration	no alteration	LOW	LOW	no alteration	no alteration	no alteration	no alteration	no alteration	no alteration	no alteration	no alteration	no alteration	no alteration
laml_tcga_pan_can_atlas_2018	TCGA-AB-2887-03	TCGA-AB-2887	1	no alteration	no alteration	no alteration	no alteration	HOMDEL	no alteration	no alteration	P718L	R132C (driver)	no alteration	no alteration	no alteration	no alteration	no alteration	no alteration	no alteration	no alteration	no alteration	no alteration	no alteration	no alteration	no alteration	no alteration	no alteration	no alteration	no alteration	no alteration	no alteration	no alteration	no alteration	no alteration	no alteration	no alteration	no alteration	no alteration	no alteration	no alteration	no alteration	HOMDEL	HOMDEL	no alteration	no alteration	no alteration	no alteration	no alteration	no alteration
laml_tcga_pan_can_atlas_2018	TCGA-AB-2888-03	TCGA-AB-2888	1	no alteration	no alteration	no alteration	no alteration	no alteration	no alteration	no alteration	no alteration	no alteration	LOW	no alteration	no alteration	no alteration	no alteration	no alteration	no alteration	no alteration	no alteration	no alteration	no alteration	no alteration	no alteration	no alteration	no alteration	no alteration	no alteration	no alteration	no alteration	no alteration	no alteration	no alteration	no alteration	no alteration	no alteration	no alteration	no alteration	no alteration	no alteration	no alteration	no alteration	no alteration	no alteration	no alteration	no alteration	no alteration	no alteration
laml_tcga_pan_can_atlas_2018	TCGA-AB-2890-03	TCGA-AB-2890	1	no alteration	no alteration	no alteration	no alteration	no alteration	no alteration	no alteration	no alteration	no alteration	no alteration	R201* (driver)	no alteration	no alteration	no alteration	no alteration	no alteration	no alteration	no alteration	no alteration	no alteration	no alteration	no alteration	no alteration	no alteration	no alteration	no alteration	no alteration	no alteration	no alteration	no alteration	no alteration	no alteration	no alteration	no alteration	no alteration	no alteration	no alteration	no alteration	no alteration	no alteration	no alteration	no alteration	no alteration	no alteration	no alteration	no alteration
laml_tcga_pan_can_atlas_2018	TCGA-AB-2891-03	TCGA-AB-2891	1	no alteration	no alteration	no alteration	HIGH	no alteration	no alteration	no alteration	X617_splice (driver), R729Q	no alteration	R140Q (driver)	no alteration	no alteration	no alteration	no alteration	not profiled	not profiled	no alteration	no alteration	no alteration	no alteration	not profiled	not profiled	no alteration	no alteration	no alteration	no alteration	not profiled	not profiled	no alteration	no alteration	no alteration	no alteration	not profiled	not profiled	HIGH	HIGH	no alteration	no alteration	not profiled	not profiled	no alteration	no alteration	no alteration	no alteration	not profiled	not profiled
laml_tcga_pan_can_atlas_2018	TCGA-AB-2895-03	TCGA-AB-2895	1	no alteration	no alteration	no alteration	no alteration	no alteration	E598_F612dup (driver), F612L	W288Cfs*12 (driver)	R882H (driver)	no alteration	no alteration	no alteration	no alteration	no alteration	no alteration	no alteration	no alteration	no alteration	no alteration	no alteration	no alteration	no alteration	no alteration	no alteration	no alteration	no alteration	no alteration	no alteration	no alteration	no alteration	no alteration	no alteration	no alteration	no alteration	no alteration	no alteration	no alteration	no alteration	no alteration	no alteration	no alteration	no alteration	no alteration	E598_F612dup (driver), F612L	no alteration	no alteration	no alteration
laml_tcga_pan_can_atlas_2018	TCGA-AB-2896-03	TCGA-AB-2896	1	no alteration	no alteration	no alteration	no alteration	no alteration	no alteration	W288Cfs*12 (driver)	R882H (driver)	no alteration	no alteration	no alteration	no alteration	no alteration	no alteration	no alteration	no alteration	no alteration	no alteration	no alteration	no alteration	no alteration	no alteration	no alteration	no alteration	no alteration	no alteration	no alteration	no alteration	no alteration	no alteration	no alteration	no alteration	no alteration	no alteration	no alteration	no alteration	no alteration	no alteration	no alteration	no alteration	no alteration	no alteration	no alteration	no alteration	no alteration	no alteration
laml_tcga_pan_can_atlas_2018	TCGA-AB-2897-03	TCGA-AB-2897	1	no alteration	no alteration	HIGH	LOW	HIGH	no alteration	no alteration	no alteration	no alteration	no alteration	no alteration	no alteration	no alteration	no alteration	no alteration	no alteration	no alteration	no alteration	no alteration	no alteration	no alteration	no alteration	no alteration	no alteration	no alteration	no alteration	no alteration	no alteration	HIGH	HIGH	no alteration	no alteration	no alteration	no alteration	LOW	LOW	no alteration	no alteration	no alteration	no alteration	HIGH	HIGH	no alteration	no alteration	no alteration	no alteration
laml_tcga_pan_can_atlas_2018	TCGA-AB-2898-03	TCGA-AB-2898	1	no alteration	no alteration	no alteration	no alteration	no alteration	no alteration	no alteration	X826_splice (driver), R792H	no alteration	R172K (driver)	no alteration	no alteration	no alteration	no alteration	no alteration	no alteration	no alteration	no alteration	no alteration	no alteration	no alteration	no alteration	no alteration	no alteration	no alteration	no alteration	no alteration	no alteration	no alteration	no alteration	no alteration	no alteration	no alteration	no alteration	no alteration	no alteration	no alteration	no alteration	no alteration	no alteration	no alteration	no alteration	no alteration	no alteration	no alteration	no alteration
laml_tcga_pan_can_atlas_2018	TCGA-AB-2899-03	TCGA-AB-2899	1	no alteration	no alteration	no alteration	no alteration	no alteration	no alteration	no alteration	no alteration	no alteration	no alteration	R162G (driver)	no alteration	no alteration	no alteration	no alteration	no alteration	no alteration	no alteration	no alteration	no alteration	no alteration	no alteration	no alteration	no alteration	no alteration	no alteration	no alteration	no alteration	no alteration	no alteration	no alteration	no alteration	no alteration	no alteration	no alteration	no alteration	no alteration	no alteration	no alteration	no alteration	no alteration	no alteration	no alteration	no alteration	no alteration	no alteration
laml_tcga_pan_can_atlas_2018	TCGA-AB-2900-03	TCGA-AB-2900	1	no alteration	no alteration	no alteration	no alteration	no alteration	D835Y (driver)	W288Cfs*12 (driver)	no alteration	no alteration	no alteration	no alteration	no alteration	no alteration	no alteration	no alteration	no alteration	no alteration	no alteration	no alteration	no alteration	no alteration	no alteration	no alteration	no alteration	no alteration	no alteration	no alteration	no alteration	no alteration	no alteration	no alteration	no alteration	no alteration	no alteration	no alteration	no alteration	no alteration	no alteration	no alteration	no alteration	no alteration	no alteration	D835Y (driver)	no alteration	no alteration	no alteration
laml_tcga_pan_can_atlas_2018	TCGA-AB-2901-03	TCGA-AB-2901	1	no alteration	no alteration	no alteration	no alteration	no alteration	no alteration	no alteration	no alteration	R132C (driver)	no alteration	HIGH	no alteration	no alteration	no alteration	no alteration	no alteration	no alteration	no alteration	no alteration	no alteration	no alteration	no alteration	no alteration	no alteration	no alteration	no alteration	no alteration	no alteration	no alteration	no alteration	no alteration	no alteration	no alteration	no alteration	no alteration	no alteration	no alteration	no alteration	no alteration	no alteration	no alteration	no alteration	no alteration	no alteration	no alteration	no alteration
laml_tcga_pan_can_atlas_2018	TCGA-AB-2903-03	TCGA-AB-2903	1	LOW	no alteration	no alteration	no alteration	no alteration	no alteration	W288Cfs*12 (driver)	no alteration	no alteration	no alteration	no alteration	no alteration	no alteration	no alteration	no alteration	no alteration	LOW	LOW	no alteration	no alteration	no alteration	no alteration	no alteration	no alteration	no alteration	no alteration	no alteration	no alteration	no alteration	no alteration	no alteration	no alteration	no alteration	no alteration	no alteration	no alteration	no alteration	no alteration	no alteration	no alteration	no alteration	no alteration	no alteration	no alteration	no alteration	no alteration
laml_tcga_pan_can_atlas_2018	TCGA-AB-2906-03	TCGA-AB-2906	1	no alteration	no alteration	no alteration	no alteration	no alteration	F594_D600dup (driver)	no alteration	no alteration	no alteration	no alteration	no alteration	no alteration	no alteration	no alteration	no alteration	no alteration	not profiled	not profiled	no alteration	no alteration	no alteration	no alteration	not profiled	not profiled	no alteration	no alteration	no alteration	no alteration	not profiled	not profiled	no alteration	no alteration	no alteration	no alteration	not profiled	not profiled	no alteration	no alteration	no alteration	no alteration	not profiled	not profiled	F594_D600dup (driver)	no alteration	no alteration	no alteration
laml_tcga_pan_can_atlas_2018	TCGA-AB-2907-03	TCGA-AB-2907	1	no alteration	no alteration	no alteration	no alteration	no alteration	no alteration	no alteration	no alteration	no alteration	R140Q (driver)	X170_splice (driver)	no alteration	no alteration	no alteration	no alteration	no alteration	not profiled	not profiled	no alteration	no alteration	no alteration	no alteration	not profiled	not profiled	no alteration	no alteration	no alteration	no alteration	not profiled	not profiled	no alteration	no alteration	no alteration	no alteration	not profiled	not profiled	no alteration	no alteration	no alteration	no alteration	not profiled	not profiled	no alteration	no alteration	no alteration	no alteration
laml_tcga_pan_can_atlas_2018	TCGA-AB-2908-03	TCGA-AB-2908	1	no alteration	no alteration	no alteration	no alteration	no alteration	no alteration	no alteration	R882C (driver)	no alteration	no alteration	no alteration	R1216* (driver)	no alteration	no alteration	no alteration	no alteration	no alteration	no alteration	no alteration	no alteration	no alteration	no alteration	no alteration	no alteration	no alteration	no alteration	no alteration	no alteration	no alteration	no alteration	no alteration	no alteration	no alteration	no alteration	no alteration	no alteration	no alteration	no alteration	no alteration	no alteration	no alteration	no alteration	no alteration	no alteration	no alteration	no alteration
laml_tcga_pan_can_atlas_2018	TCGA-AB-2909-03	TCGA-AB-2909	1	no alteration	no alteration	no alteration	no alteration	no alteration	R595delinsSRI (driver)	no alteration	no alteration	no alteration	no alteration	no alteration	no alteration	no alteration	no alteration	no alteration	no alteration	no alteration	no alteration	no alteration	no alteration	no alteration	no alteration	no alteration	no alteration	no alteration	no alteration	no alteration	no alteration	no alteration	no alteration	no alteration	no alteration	no alteration	no alteration	no alteration	no alteration	no alteration	no alteration	no alteration	no alteration	no alteration	no alteration	R595delinsSRI (driver)	no alteration	no alteration	no alteration
laml_tcga_pan_can_atlas_2018	TCGA-AB-2910-03	TCGA-AB-2910	1	no alteration	no alteration	no alteration	no alteration	no alteration	D835H (driver)	no alteration	no alteration	HIGH	HIGH	no alteration	no alteration	no alteration	no alteration	no alteration	no alteration	no alteration	no alteration	no alteration	no alteration	no alteration	no alteration	no alteration	no alteration	no alteration	no alteration	no alteration	no alteration	no alteration	no alteration	no alteration	no alteration	no alteration	no alteration	no alteration	no alteration	no alteration	no alteration	no alteration	no alteration	no alteration	no alteration	D835H (driver)	no alteration	no alteration	no alteration
laml_tcga_pan_can_atlas_2018	TCGA-AB-2912-03	TCGA-AB-2912	1	no alteration	no alteration	no alteration	no alteration	no alteration	no alteration	no alteration	R729W	no alteration	no alteration	R162K (driver)	no alteration	no alteration	no alteration	no alteration	no alteration	no alteration	no alteration	no alteration	no alteration	no alteration	no alteration	no alteration	no alteration	no alteration	no alteration	no alteration	no alteration	no alteration	no alteration	no alteration	no alteration	no alteration	no alteration	no alteration	no alteration	no alteration	no alteration	no alteration	no alteration	no alteration	no alteration	no alteration	no alteration	no alteration	no alteration
laml_tcga_pan_can_atlas_2018	TCGA-AB-2913-03	TCGA-AB-2913	1	HIGH	no alteration	no alteration	no alteration	no alteration	S584_F605dup (driver)	W288Cfs*12 (driver)	no alteration	no alteration	no alteration	no alteration	no alteration	no alteration	no alteration	no alteration	no alteration	HIGH	HIGH	no alteration	no alteration	no alteration	no alteration	no alteration	no alteration	no alteration	no alteration	no alteration	no alteration	no alteration	no alteration	no alteration	no alteration	no alteration	no alteration	no alteration	no alteration	no alteration	no alteration	no alteration	no alteration	no alteration	no alteration	S584_F605dup (driver)	no alteration	no alteration	no alteration
laml_tcga_pan_can_atlas_2018	TCGA-AB-2915-03	TCGA-AB-2915	1	no alteration	no alteration	no alteration	no alteration	no alteration	E598_Y599insSGSSDNEYFYVDFREYE (driver)	K263R	no alteration	no alteration	no alteration	RUNX1-MECOM fusion	no alteration	no alteration	no alteration	no alteration	no alteration	no alteration	no alteration	no alteration	no alteration	no alteration	no alteration	no alteration	no alteration	no alteration	no alteration	no alteration	no alteration	no alteration	no alteration	no alteration	no alteration	no alteration	no alteration	no alteration	no alteration	no alteration	no alteration	no alteration	no alteration	no alteration	no alteration	E598_Y599insSGSSDNEYFYVDFREYE (driver)	no alteration	no alteration	no alteration
laml_tcga_pan_can_atlas_2018	TCGA-AB-2916-03	TCGA-AB-2916	1	no alteration	no alteration	no alteration	no alteration	no alteration	no alteration	no alteration	R882C (driver)	no alteration	LOW	N96Kfs*42 (driver)	HIGH	no alteration	no alteration	no alteration	no alteration	no alteration	no alteration	no alteration	no alteration	no alteration	no alteration	no alteration	no alteration	no alteration	no alteration	no alteration	no alteration	no alteration	no alteration	no alteration	no alteration	no alteration	no alteration	no alteration	no alteration	no alteration	no alteration	no alteration	no alteration	no alteration	no alteration	no alteration	no alteration	no alteration	no alteration
laml_tcga_pan_can_atlas_2018	TCGA-AB-2918-03	TCGA-AB-2918	1	no alteration	no alteration	no alteration	no alteration	no alteration	L601_K602insQRI*I*F (driver)	no alteration	no alteration	no alteration	no alteration	no alteration	no alteration	no alteration	no alteration	not profiled	not profiled	no alteration	no alteration	no alteration	no alteration	not profiled	not profiled	no alteration	no alteration	no alteration	no alteration	not profiled	not profiled	no alteration	no alteration	no alteration	no alteration	not profiled	not profiled	no alteration	no alteration	no alteration	no alteration	not profiled	not profiled	no alteration	no alteration	L601_K602insQRI*I*F (driver)	no alteration	not profiled	not profiled
laml_tcga_pan_can_atlas_2018	TCGA-AB-2919-03	TCGA-AB-2919	1	no alteration	no alteration	no alteration	no alteration	no alteration	D835N (driver)	W288Cfs*12 (driver)	C497Y (driver)	R132C (driver)	no alteration	no alteration	no alteration	no alteration	no alteration	no alteration	no alteration	no alteration	no alteration	no alteration	no alteration	no alteration	no alteration	no alteration	no alteration	no alteration	no alteration	no alteration	no alteration	no alteration	no alteration	no alteration	no alteration	no alteration	no alteration	no alteration	no alteration	no alteration	no alteration	no alteration	no alteration	no alteration	no alteration	D835N (driver)	no alteration	no alteration	no alteration
laml_tcga_pan_can_atlas_2018	TCGA-AB-2920-03	TCGA-AB-2920	1	no alteration	no alteration	no alteration	no alteration	no alteration	no alteration	LOW	no alteration	no alteration	no alteration	no alteration	no alteration	no alteration	no alteration	no alteration	no alteration	no alteration	no alteration	no alteration	no alteration	no alteration	no alteration	no alteration	no alteration	no alteration	no alteration	no alteration	no alteration	no alteration	no alteration	no alteration	no alteration	no alteration	no alteration	no alteration	no alteration	no alteration	no alteration	no alteration	no alteration	no alteration	no alteration	no alteration	no alteration	no alteration	no alteration
laml_tcga_pan_can_atlas_2018	TCGA-AB-2921-03	TCGA-AB-2921	1	no alteration	no alteration	no alteration	no alteration	no alteration	E598_Y599insIR*FQRI* (driver)	no alteration	no alteration	no alteration	no alteration	no alteration	no alteration	no alteration	no alteration	no alteration	no alteration	no alteration	no alteration	no alteration	no alteration	no alteration	no alteration	no alteration	no alteration	no alteration	no alteration	no alteration	no alteration	no alteration	no alteration	no alteration	no alteration	no alteration	no alteration	no alteration	no alteration	no alteration	no alteration	no alteration	no alteration	no alteration	no alteration	E598_Y599insIR*FQRI* (driver)	no alteration	no alteration	no alteration
laml_tcga_pan_can_atlas_2018	TCGA-AB-2922-03	TCGA-AB-2922	1	no alteration	no alteration	no alteration	no alteration	no alteration	D593_F594insSPEDNEYFYVD (driver)	no alteration	no alteration	no alteration	no alteration	no alteration	no alteration	no alteration	no alteration	no alteration	no alteration	not profiled	not profiled	no alteration	no alteration	no alteration	no alteration	not profiled	not profiled	no alteration	no alteration	no alteration	no alteration	not profiled	not profiled	no alteration	no alteration	no alteration	no alteration	not profiled	not profiled	no alteration	no alteration	no alteration	no alteration	not profiled	not profiled	D593_F594insSPEDNEYFYVD (driver)	no alteration	no alteration	no alteration
laml_tcga_pan_can_atlas_2018	TCGA-AB-2923-03	TCGA-AB-2923	1	no alteration	no alteration	no alteration	no alteration	no alteration	no alteration	no alteration	no alteration	no alteration	no alteration	no alteration	Q958Tfs*14 (driver), R550* (driver)	no alteration	no alteration	no alteration	no alteration	not profiled	not profiled	no alteration	no alteration	no alteration	no alteration	not profiled	not profiled	no alteration	no alteration	no alteration	no alteration	not profiled	not profiled	no alteration	no alteration	no alteration	no alteration	not profiled	not profiled	no alteration	no alteration	no alteration	no alteration	not profiled	not profiled	no alteration	no alteration	no alteration	no alteration
laml_tcga_pan_can_atlas_2018	TCGA-AB-2924-03	TCGA-AB-2924	1	no alteration	no alteration	no alteration	no alteration	no alteration	D835Y (driver)	W288Lfs*2 (driver)	no alteration	no alteration	no alteration	no alteration	no alteration	no alteration	no alteration	no alteration	no alteration	no alteration	no alteration	no alteration	no alteration	no alteration	no alteration	no alteration	no alteration	no alteration	no alteration	no alteration	no alteration	no alteration	no alteration	no alteration	no alteration	no alteration	no alteration	no alteration	no alteration	no alteration	no alteration	no alteration	no alteration	no alteration	no alteration	D835Y (driver)	no alteration	no alteration	no alteration
laml_tcga_pan_can_atlas_2018	TCGA-AB-2925-03	TCGA-AB-2925	1	no alteration	no alteration	no alteration	no alteration	no alteration	N587_D600dup (driver)	W288Cfs*12 (driver)	R882H (driver)	no alteration	no alteration	no alteration	no alteration	no alteration	no alteration	no alteration	no alteration	no alteration	no alteration	no alteration	no alteration	no alteration	no alteration	no alteration	no alteration	no alteration	no alteration	no alteration	no alteration	no alteration	no alteration	no alteration	no alteration	no alteration	no alteration	no alteration	no alteration	no alteration	no alteration	no alteration	no alteration	no alteration	no alteration	N587_D600dup (driver)	no alteration	no alteration	no alteration
laml_tcga_pan_can_atlas_2018	TCGA-AB-2926-03	TCGA-AB-2926	1	no alteration	no alteration	no alteration	no alteration	no alteration	D835Y (driver)	no alteration	no alteration	R132C (driver)	no alteration	no alteration	no alteration	no alteration	no alteration	no alteration	no alteration	not profiled	not profiled	no alteration	no alteration	no alteration	no alteration	not profiled	not profiled	no alteration	no alteration	no alteration	no alteration	not profiled	not profiled	no alteration	no alteration	no alteration	no alteration	not profiled	not profiled	no alteration	no alteration	no alteration	no alteration	not profiled	not profiled	D835Y (driver)	no alteration	no alteration	no alteration
laml_tcga_pan_can_atlas_2018	TCGA-AB-2927-03	TCGA-AB-2927	1	no alteration	no alteration	no alteration	no alteration	no alteration	no alteration	no alteration	no alteration	no alteration	no alteration	R162S (driver), R201* (driver)	no alteration	no alteration	no alteration	no alteration	no alteration	no alteration	no alteration	no alteration	no alteration	no alteration	no alteration	no alteration	no alteration	no alteration	no alteration	no alteration	no alteration	no alteration	no alteration	no alteration	no alteration	no alteration	no alteration	no alteration	no alteration	no alteration	no alteration	no alteration	no alteration	no alteration	no alteration	no alteration	no alteration	no alteration	no alteration
laml_tcga_pan_can_atlas_2018	TCGA-AB-2928-03	TCGA-AB-2928	1	no alteration	no alteration	no alteration	no alteration	no alteration	D839G (driver)	no alteration	D781G (driver), R320* (driver)	R132C (driver)	no alteration	no alteration	P1115Lfs*2 (driver), E1352V	no alteration	no alteration	no alteration	no alteration	no alteration	no alteration	no alteration	no alteration	no alteration	no alteration	no alteration	no alteration	no alteration	no alteration	no alteration	no alteration	no alteration	no alteration	no alteration	no alteration	no alteration	no alteration	no alteration	no alteration	no alteration	no alteration	no alteration	no alteration	no alteration	no alteration	D839G (driver)	no alteration	no alteration	no alteration
laml_tcga_pan_can_atlas_2018	TCGA-AB-2929-03	TCGA-AB-2929	1	no alteration	no alteration	HIGH	no alteration	no alteration	no alteration	no alteration	no alteration	no alteration	no alteration	no alteration	no alteration	no alteration	no alteration	no alteration	no alteration	no alteration	no alteration	no alteration	no alteration	no alteration	no alteration	no alteration	no alteration	no alteration	no alteration	no alteration	no alteration	HIGH	HIGH	no alteration	no alteration	no alteration	no alteration	no alteration	no alteration	no alteration	no alteration	no alteration	no alteration	no alteration	no alteration	no alteration	no alteration	no alteration	no alteration
laml_tcga_pan_can_atlas_2018	TCGA-AB-2930-03	TCGA-AB-2930	1	no alteration	no alteration	no alteration	no alteration	no alteration	F594_R595insGTGSSDNEYFYVDF (driver)	no alteration	no alteration	no alteration	no alteration	no alteration	no alteration	no alteration	no alteration	no alteration	no alteration	no alteration	no alteration	no alteration	no alteration	no alteration	no alteration	no alteration	no alteration	no alteration	no alteration	no alteration	no alteration	no alteration	no alteration	no alteration	no alteration	no alteration	no alteration	no alteration	no alteration	no alteration	no alteration	no alteration	no alteration	no alteration	no alteration	F594_R595insGTGSSDNEYFYVDF (driver)	no alteration	no alteration	no alteration
laml_tcga_pan_can_atlas_2018	TCGA-AB-2931-03	TCGA-AB-2931	1	no alteration	no alteration	no alteration	no alteration	no alteration	F612_G613insQGFYVDFREYEYDLKWEFPRENLEF (driver)	W288Cfs*12 (driver)	R882C (driver)	no alteration	no alteration	no alteration	no alteration	no alteration	no alteration	no alteration	no alteration	no alteration	no alteration	no alteration	no alteration	no alteration	no alteration	no alteration	no alteration	no alteration	no alteration	no alteration	no alteration	no alteration	no alteration	no alteration	no alteration	no alteration	no alteration	no alteration	no alteration	no alteration	no alteration	no alteration	no alteration	no alteration	no alteration	F612_G613insQGFYVDFREYEYDLKWEFPRENLEF (driver)	no alteration	no alteration	no alteration
laml_tcga_pan_can_atlas_2018	TCGA-AB-2932-03	TCGA-AB-2932	1	no alteration	no alteration	no alteration	no alteration	no alteration	no alteration	W288Cfs*12 (driver)	no alteration	no alteration	no alteration	no alteration	no alteration	no alteration	no alteration	no alteration	no alteration	no alteration	no alteration	no alteration	no alteration	no alteration	no alteration	no alteration	no alteration	no alteration	no alteration	no alteration	no alteration	no alteration	no alteration	no alteration	no alteration	no alteration	no alteration	no alteration	no alteration	no alteration	no alteration	no alteration	no alteration	no alteration	no alteration	no alteration	no alteration	no alteration	no alteration
laml_tcga_pan_can_atlas_2018	TCGA-AB-2933-03	TCGA-AB-2933	1	LOW	no alteration	no alteration	no alteration	no alteration	no alteration	no alteration	no alteration	no alteration	no alteration	R162G (driver)	no alteration	no alteration	no alteration	no alteration	no alteration	LOW	LOW	no alteration	no alteration	no alteration	no alteration	no alteration	no alteration	no alteration	no alteration	no alteration	no alteration	no alteration	no alteration	no alteration	no alteration	no alteration	no alteration	no alteration	no alteration	no alteration	no alteration	no alteration	no alteration	no alteration	no alteration	no alteration	no alteration	no alteration	no alteration
laml_tcga_pan_can_atlas_2018	TCGA-AB-2934-03	TCGA-AB-2934	1	no alteration	no alteration	no alteration	no alteration	no alteration	Y599_D600insGTGS*DNEYFYVDFREYEY	no alteration	G646V (driver), R736H (driver)	no alteration	R140Q (driver)	no alteration	no alteration	no alteration	no alteration	no alteration	no alteration	no alteration	no alteration	no alteration	no alteration	no alteration	no alteration	no alteration	no alteration	no alteration	no alteration	no alteration	no alteration	no alteration	no alteration	no alteration	no alteration	no alteration	no alteration	no alteration	no alteration	no alteration	no alteration	no alteration	no alteration	no alteration	no alteration	Y599_D600insGTGS*DNEYFYVDFREYEY	no alteration	no alteration	no alteration
laml_tcga_pan_can_atlas_2018	TCGA-AB-2936-03	TCGA-AB-2936	1	no alteration	no alteration	no alteration	no alteration	no alteration	no alteration	no alteration	no alteration	no alteration	R140Q (driver)	R320* (driver), HIGH	no alteration	no alteration	no alteration	no alteration	no alteration	no alteration	no alteration	no alteration	no alteration	no alteration	no alteration	no alteration	no alteration	no alteration	no alteration	no alteration	no alteration	no alteration	no alteration	no alteration	no alteration	no alteration	no alteration	no alteration	no alteration	no alteration	no alteration	no alteration	no alteration	no alteration	no alteration	no alteration	no alteration	no alteration	no alteration
laml_tcga_pan_can_atlas_2018	TCGA-AB-2937-03	TCGA-AB-2937	1	LOW	LOW	no alteration	no alteration	no alteration	no alteration	no alteration	no alteration	no alteration	HIGH	RUNX1-RUNX1T1 fusion	F125Lfs*3 (driver), HOMDEL (driver), LOW	no alteration	no alteration	no alteration	no alteration	LOW	LOW	no alteration	no alteration	no alteration	no alteration	LOW	LOW	no alteration	no alteration	no alteration	no alteration	no alteration	no alteration	no alteration	no alteration	no alteration	no alteration	no alteration	no alteration	no alteration	no alteration	no alteration	no alteration	no alteration	no alteration	no alteration	no alteration	no alteration	no alteration
laml_tcga_pan_can_atlas_2018	TCGA-AB-2938-03	TCGA-AB-2938	1	no alteration	no alteration	no alteration	no alteration	no alteration	LOW	no alteration	M315* (driver)	no alteration	no alteration	no alteration	no alteration	no alteration	no alteration	no alteration	no alteration	no alteration	no alteration	no alteration	no alteration	no alteration	no alteration	no alteration	no alteration	no alteration	no alteration	no alteration	no alteration	no alteration	no alteration	no alteration	no alteration	no alteration	no alteration	no alteration	no alteration	no alteration	no alteration	no alteration	no alteration	no alteration	no alteration	no alteration	no alteration	no alteration	no alteration
laml_tcga_pan_can_atlas_2018	TCGA-AB-2939-03	TCGA-AB-2939	1	no alteration	no alteration	no alteration	no alteration	no alteration	no alteration	LOW	no alteration	no alteration	no alteration	no alteration	no alteration	no alteration	no alteration	no alteration	no alteration	no alteration	no alteration	no alteration	no alteration	no alteration	no alteration	no alteration	no alteration	no alteration	no alteration	no alteration	no alteration	no alteration	no alteration	no alteration	no alteration	no alteration	no alteration	no alteration	no alteration	no alteration	no alteration	no alteration	no alteration	no alteration	no alteration	no alteration	no alteration	no alteration	no alteration
laml_tcga_pan_can_atlas_2018	TCGA-AB-2941-03	TCGA-AB-2941	1	no alteration	no alteration	no alteration	no alteration	no alteration	LOW	no alteration	no alteration	no alteration	no alteration	no alteration	no alteration	no alteration	no alteration	no alteration	no alteration	no alteration	no alteration	no alteration	no alteration	no alteration	no alteration	no alteration	no alteration	no alteration	no alteration	no alteration	no alteration	no alteration	no alteration	no alteration	no alteration	no alteration	no alteration	no alteration	no alteration	no alteration	no alteration	no alteration	no alteration	no alteration	no alteration	no alteration	no alteration	no alteration	no alteration
laml_tcga_pan_can_atlas_2018	TCGA-AB-2942-03	TCGA-AB-2942	1	no alteration	no alteration	no alteration	no alteration	no alteration	Y599_D600insR*FQRI*I (driver)	no alteration	no alteration	no alteration	no alteration	no alteration	no alteration	no alteration	no alteration	no alteration	no alteration	no alteration	no alteration	no alteration	no alteration	no alteration	no alteration	no alteration	no alteration	no alteration	no alteration	no alteration	no alteration	no alteration	no alteration	no alteration	no alteration	no alteration	no alteration	no alteration	no alteration	no alteration	no alteration	no alteration	no alteration	no alteration	no alteration	Y599_D600insR*FQRI*I (driver)	no alteration	no alteration	no alteration
laml_tcga_pan_can_atlas_2018	TCGA-AB-2945-03	TCGA-AB-2945	1	no alteration	no alteration	no alteration	no alteration	no alteration	D835E (driver)	W288Cfs*12 (driver)	R882H (driver)	R132H (driver)	no alteration	no alteration	no alteration	no alteration	no alteration	no alteration	no alteration	not profiled	not profiled	no alteration	no alteration	no alteration	no alteration	not profiled	not profiled	no alteration	no alteration	no alteration	no alteration	not profiled	not profiled	no alteration	no alteration	no alteration	no alteration	not profiled	not profiled	no alteration	no alteration	no alteration	no alteration	not profiled	not profiled	D835E (driver)	no alteration	no alteration	no alteration
laml_tcga_pan_can_atlas_2018	TCGA-AB-2946-03	TCGA-AB-2946	1	no alteration	no alteration	no alteration	no alteration	no alteration	no alteration	no alteration	no alteration	no alteration	no alteration	LOW	no alteration	no alteration	no alteration	no alteration	no alteration	no alteration	no alteration	no alteration	no alteration	no alteration	no alteration	no alteration	no alteration	no alteration	no alteration	no alteration	no alteration	no alteration	no alteration	no alteration	no alteration	no alteration	no alteration	no alteration	no alteration	no alteration	no alteration	no alteration	no alteration	no alteration	no alteration	no alteration	no alteration	no alteration	no alteration
laml_tcga_pan_can_atlas_2018	TCGA-AB-2947-03	TCGA-AB-2947	1	no alteration	no alteration	no alteration	no alteration	no alteration	D835Y (driver)	W288Cfs*12 (driver)	R882H (driver)	no alteration	no alteration	no alteration	no alteration	no alteration	no alteration	no alteration	no alteration	not profiled	not profiled	no alteration	no alteration	no alteration	no alteration	not profiled	not profiled	no alteration	no alteration	no alteration	no alteration	not profiled	not profiled	no alteration	no alteration	no alteration	no alteration	not profiled	not profiled	no alteration	no alteration	no alteration	no alteration	not profiled	not profiled	D835Y (driver)	no alteration	no alteration	no alteration
laml_tcga_pan_can_atlas_2018	TCGA-AB-2948-03	TCGA-AB-2948	1	no alteration	no alteration	no alteration	no alteration	no alteration	no alteration	no alteration	no alteration	no alteration	R140Q (driver)	no alteration	no alteration	no alteration	no alteration	no alteration	no alteration	no alteration	no alteration	no alteration	no alteration	no alteration	no alteration	no alteration	no alteration	no alteration	no alteration	no alteration	no alteration	no alteration	no alteration	no alteration	no alteration	no alteration	no alteration	no alteration	no alteration	no alteration	no alteration	no alteration	no alteration	no alteration	no alteration	no alteration	no alteration	no alteration	no alteration
laml_tcga_pan_can_atlas_2018	TCGA-AB-2949-03	TCGA-AB-2949	1	no alteration	no alteration	no alteration	no alteration	no alteration	no alteration	no alteration	R882H (driver)	R132H (driver)	R140Q (driver)	T196I	no alteration	no alteration	no alteration	no alteration	no alteration	no alteration	no alteration	no alteration	no alteration	no alteration	no alteration	no alteration	no alteration	no alteration	no alteration	no alteration	no alteration	no alteration	no alteration	no alteration	no alteration	no alteration	no alteration	no alteration	no alteration	no alteration	no alteration	no alteration	no alteration	no alteration	no alteration	no alteration	no alteration	no alteration	no alteration
laml_tcga_pan_can_atlas_2018	TCGA-AB-2950-03	TCGA-AB-2950	1	no alteration	no alteration	no alteration	LOW	no alteration	no alteration	no alteration	no alteration	no alteration	no alteration	RUNX1-RUNX1T1 fusion	no alteration	no alteration	no alteration	no alteration	no alteration	no alteration	no alteration	no alteration	no alteration	no alteration	no alteration	no alteration	no alteration	no alteration	no alteration	no alteration	no alteration	no alteration	no alteration	no alteration	no alteration	no alteration	no alteration	LOW	LOW	no alteration	no alteration	no alteration	no alteration	no alteration	no alteration	no alteration	no alteration	no alteration	no alteration
laml_tcga_pan_can_atlas_2018	TCGA-AB-2952-03	TCGA-AB-2952	1	no alteration	AMP	no alteration	no alteration	no alteration	no alteration	no alteration	no alteration	no alteration	no alteration	no alteration	no alteration	no alteration	no alteration	no alteration	no alteration	no alteration	no alteration	no alteration	no alteration	AMP	AMP	no alteration	no alteration	no alteration	no alteration	no alteration	no alteration	no alteration	no alteration	no alteration	no alteration	no alteration	no alteration	no alteration	no alteration	no alteration	no alteration	no alteration	no alteration	no alteration	no alteration	no alteration	no alteration	no alteration	no alteration
laml_tcga_pan_can_atlas_2018	TCGA-AB-2954-03	TCGA-AB-2954	1	LOW	no alteration	no alteration	no alteration	no alteration	no alteration	no alteration	no alteration	no alteration	no alteration	no alteration	no alteration	no alteration	no alteration	no alteration	no alteration	LOW	LOW	no alteration	no alteration	no alteration	no alteration	no alteration	no alteration	no alteration	no alteration	no alteration	no alteration	no alteration	no alteration	no alteration	no alteration	no alteration	no alteration	no alteration	no alteration	no alteration	no alteration	no alteration	no alteration	no alteration	no alteration	no alteration	no alteration	no alteration	no alteration
laml_tcga_pan_can_atlas_2018	TCGA-AB-2955-03	TCGA-AB-2955	1	no alteration	LOW	no alteration	HIGH	no alteration	HOMDEL	no alteration	R882H (driver)	no alteration	no alteration	no alteration	no alteration	no alteration	no alteration	no alteration	no alteration	no alteration	no alteration	no alteration	no alteration	no alteration	no alteration	LOW	LOW	no alteration	no alteration	no alteration	no alteration	no alteration	no alteration	no alteration	no alteration	no alteration	no alteration	HIGH	HIGH	no alteration	no alteration	no alteration	no alteration	no alteration	no alteration	no alteration	no alteration	HOMDEL	HOMDEL
laml_tcga_pan_can_atlas_2018	TCGA-AB-2956-03	TCGA-AB-2956	1	no alteration	no alteration	no alteration	no alteration	no alteration	no alteration	no alteration	LOW	no alteration	no alteration	no alteration	no alteration	no alteration	no alteration	no alteration	no alteration	no alteration	no alteration	no alteration	no alteration	no alteration	no alteration	no alteration	no alteration	no alteration	no alteration	no alteration	no alteration	no alteration	no alteration	no alteration	no alteration	no alteration	no alteration	no alteration	no alteration	no alteration	no alteration	no alteration	no alteration	no alteration	no alteration	no alteration	no alteration	no alteration	no alteration
laml_tcga_pan_can_atlas_2018	TCGA-AB-2957-03	TCGA-AB-2957	1	no alteration	no alteration	no alteration	no alteration	no alteration	D835Y (driver)	no alteration	no alteration	no alteration	no alteration	no alteration	no alteration	no alteration	no alteration	no alteration	no alteration	not profiled	not profiled	no alteration	no alteration	no alteration	no alteration	not profiled	not profiled	no alteration	no alteration	no alteration	no alteration	not profiled	not profiled	no alteration	no alteration	no alteration	no alteration	not profiled	not profiled	no alteration	no alteration	no alteration	no alteration	not profiled	not profiled	D835Y (driver)	no alteration	no alteration	no alteration
laml_tcga_pan_can_atlas_2018	TCGA-AB-2959-03	TCGA-AB-2959	1	no alteration	no alteration	no alteration	no alteration	no alteration	no alteration	no alteration	no alteration	no alteration	R140Q (driver)	R201Q (driver), HIGH	no alteration	no alteration	no alteration	no alteration	no alteration	no alteration	no alteration	no alteration	no alteration	no alteration	no alteration	no alteration	no alteration	no alteration	no alteration	no alteration	no alteration	no alteration	no alteration	no alteration	no alteration	no alteration	no alteration	no alteration	no alteration	no alteration	no alteration	no alteration	no alteration	no alteration	no alteration	no alteration	no alteration	no alteration	no alteration
laml_tcga_pan_can_atlas_2018	TCGA-AB-2963-03	TCGA-AB-2963	1	no alteration	no alteration	no alteration	no alteration	LOW	D835Y (driver)	W288Cfs*12 (driver)	no alteration	no alteration	no alteration	no alteration	no alteration	no alteration	no alteration	no alteration	no alteration	no alteration	no alteration	no alteration	no alteration	no alteration	no alteration	no alteration	no alteration	no alteration	no alteration	no alteration	no alteration	no alteration	no alteration	no alteration	no alteration	no alteration	no alteration	no alteration	no alteration	no alteration	no alteration	no alteration	no alteration	LOW	LOW	D835Y (driver)	no alteration	no alteration	no alteration
laml_tcga_pan_can_atlas_2018	TCGA-AB-2964-03	TCGA-AB-2964	1	no alteration	no alteration	no alteration	no alteration	no alteration	no alteration	no alteration	no alteration	no alteration	no alteration	no alteration	Q916* (driver), P1889L	no alteration	no alteration	no alteration	no alteration	no alteration	no alteration	no alteration	no alteration	no alteration	no alteration	no alteration	no alteration	no alteration	no alteration	no alteration	no alteration	no alteration	no alteration	no alteration	no alteration	no alteration	no alteration	no alteration	no alteration	no alteration	no alteration	no alteration	no alteration	no alteration	no alteration	no alteration	no alteration	no alteration	no alteration
laml_tcga_pan_can_atlas_2018	TCGA-AB-2965-03	TCGA-AB-2965	1	no alteration	no alteration	no alteration	no alteration	no alteration	E573_S574insKPATDGTGDRLLR**VLLR*FQRK	W288Cfs*12 (driver)	R882H (driver)	no alteration	no alteration	no alteration	P1316Qfs*47 (driver)	no alteration	no alteration	no alteration	no alteration	no alteration	no alteration	no alteration	no alteration	no alteration	no alteration	no alteration	no alteration	no alteration	no alteration	no alteration	no alteration	no alteration	no alteration	no alteration	no alteration	no alteration	no alteration	no alteration	no alteration	no alteration	no alteration	no alteration	no alteration	no alteration	no alteration	E573_S574insKPATDGTGDRLLR**VLLR*FQRK	no alteration	no alteration	no alteration
laml_tcga_pan_can_atlas_2018	TCGA-AB-2966-03	TCGA-AB-2966	1	no alteration	LOW	no alteration	no alteration	no alteration	no alteration	no alteration	G590Vfs*61 (driver), HOMDEL (driver)	no alteration	R140Q (driver)	no alteration	no alteration	no alteration	no alteration	no alteration	no alteration	no alteration	no alteration	no alteration	no alteration	no alteration	no alteration	LOW	LOW	no alteration	no alteration	no alteration	no alteration	no alteration	no alteration	no alteration	no alteration	no alteration	no alteration	no alteration	no alteration	no alteration	no alteration	no alteration	no alteration	no alteration	no alteration	no alteration	no alteration	no alteration	no alteration
laml_tcga_pan_can_atlas_2018	TCGA-AB-2967-03	TCGA-AB-2967	1	no alteration	no alteration	no alteration	no alteration	no alteration	no alteration	W288Cfs*12 (driver)	E505* (driver)	no alteration	no alteration	no alteration	no alteration	no alteration	no alteration	no alteration	no alteration	no alteration	no alteration	no alteration	no alteration	no alteration	no alteration	no alteration	no alteration	no alteration	no alteration	no alteration	no alteration	no alteration	no alteration	no alteration	no alteration	no alteration	no alteration	no alteration	no alteration	no alteration	no alteration	no alteration	no alteration	no alteration	no alteration	no alteration	no alteration	no alteration	no alteration
laml_tcga_pan_can_atlas_2018	TCGA-AB-2968-03	TCGA-AB-2968	1	no alteration	no alteration	no alteration	no alteration	no alteration	no alteration	no alteration	A741V (driver), E477* (driver)	no alteration	no alteration	no alteration	no alteration	no alteration	no alteration	no alteration	no alteration	not profiled	not profiled	no alteration	no alteration	no alteration	no alteration	not profiled	not profiled	no alteration	no alteration	no alteration	no alteration	not profiled	not profiled	no alteration	no alteration	no alteration	no alteration	not profiled	not profiled	no alteration	no alteration	no alteration	no alteration	not profiled	not profiled	no alteration	no alteration	no alteration	no alteration
laml_tcga_pan_can_atlas_2018	TCGA-AB-2969-03	TCGA-AB-2969	1	no alteration	no alteration	no alteration	no alteration	no alteration	D835H (driver)	W288Cfs*12 (driver)	R882H (driver)	R132H (driver)	no alteration	no alteration	no alteration	no alteration	no alteration	no alteration	no alteration	no alteration	no alteration	no alteration	no alteration	no alteration	no alteration	no alteration	no alteration	no alteration	no alteration	no alteration	no alteration	no alteration	no alteration	no alteration	no alteration	no alteration	no alteration	no alteration	no alteration	no alteration	no alteration	no alteration	no alteration	no alteration	no alteration	D835H (driver)	no alteration	no alteration	no alteration
laml_tcga_pan_can_atlas_2018	TCGA-AB-2970-03	TCGA-AB-2970	1	no alteration	no alteration	no alteration	no alteration	no alteration	Y599_D600insPAPQIMSTSTLISENMNIA (driver)	no alteration	no alteration	no alteration	no alteration	P113L	no alteration	no alteration	no alteration	no alteration	no alteration	no alteration	no alteration	no alteration	no alteration	no alteration	no alteration	no alteration	no alteration	no alteration	no alteration	no alteration	no alteration	no alteration	no alteration	no alteration	no alteration	no alteration	no alteration	no alteration	no alteration	no alteration	no alteration	no alteration	no alteration	no alteration	no alteration	Y599_D600insPAPQIMSTSTLISENMNIA (driver)	no alteration	no alteration	no alteration
laml_tcga_pan_can_atlas_2018	TCGA-AB-2971-03	TCGA-AB-2971	1	no alteration	no alteration	no alteration	no alteration	no alteration	no alteration	no alteration	no alteration	no alteration	no alteration	no alteration	A1071Lfs*11 (driver), A1863D	no alteration	no alteration	no alteration	no alteration	no alteration	no alteration	no alteration	no alteration	no alteration	no alteration	no alteration	no alteration	no alteration	no alteration	no alteration	no alteration	no alteration	no alteration	no alteration	no alteration	no alteration	no alteration	no alteration	no alteration	no alteration	no alteration	no alteration	no alteration	no alteration	no alteration	no alteration	no alteration	no alteration	no alteration
laml_tcga_pan_can_atlas_2018	TCGA-AB-2972-03	TCGA-AB-2972	1	no alteration	no alteration	no alteration	no alteration	no alteration	no alteration	W288Cfs*12 (driver)	no alteration	no alteration	no alteration	no alteration	no alteration	no alteration	no alteration	no alteration	no alteration	no alteration	no alteration	no alteration	no alteration	no alteration	no alteration	no alteration	no alteration	no alteration	no alteration	no alteration	no alteration	no alteration	no alteration	no alteration	no alteration	no alteration	no alteration	no alteration	no alteration	no alteration	no alteration	no alteration	no alteration	no alteration	no alteration	no alteration	no alteration	no alteration	no alteration
laml_tcga_pan_can_atlas_2018	TCGA-AB-2973-03	TCGA-AB-2973	1	LOW	no alteration	no alteration	no alteration	no alteration	LOW	W288Cfs*12 (driver)	LOW	no alteration	R140Q (driver)	no alteration	no alteration	no alteration	no alteration	no alteration	no alteration	LOW	LOW	no alteration	no alteration	no alteration	no alteration	no alteration	no alteration	no alteration	no alteration	no alteration	no alteration	no alteration	no alteration	no alteration	no alteration	no alteration	no alteration	no alteration	no alteration	no alteration	no alteration	no alteration	no alteration	no alteration	no alteration	no alteration	no alteration	no alteration	no alteration
laml_tcga_pan_can_atlas_2018	TCGA-AB-2974-03	TCGA-AB-2974	1	no alteration	no alteration	no alteration	no alteration	no alteration	D835Y (driver)	W288Cfs*12 (driver)	R882C (driver)	no alteration	no alteration	no alteration	no alteration	no alteration	no alteration	no alteration	no alteration	not profiled	not profiled	no alteration	no alteration	no alteration	no alteration	not profiled	not profiled	no alteration	no alteration	no alteration	no alteration	not profiled	not profiled	no alteration	no alteration	no alteration	no alteration	not profiled	not profiled	no alteration	no alteration	no alteration	no alteration	not profiled	not profiled	D835Y (driver)	no alteration	no alteration	no alteration
laml_tcga_pan_can_atlas_2018	TCGA-AB-2975-03	TCGA-AB-2975	1	no alteration	no alteration	no alteration	no alteration	no alteration	no alteration	no alteration	R882H (driver)	no alteration	no alteration	no alteration	no alteration	no alteration	no alteration	no alteration	no alteration	no alteration	no alteration	no alteration	no alteration	no alteration	no alteration	no alteration	no alteration	no alteration	no alteration	no alteration	no alteration	no alteration	no alteration	no alteration	no alteration	no alteration	no alteration	no alteration	no alteration	no alteration	no alteration	no alteration	no alteration	no alteration	no alteration	no alteration	no alteration	no alteration	no alteration
laml_tcga_pan_can_atlas_2018	TCGA-AB-2976-03	TCGA-AB-2976	1	no alteration	no alteration	no alteration	no alteration	no alteration	Y599_D600insEYEYEYEY (driver)	W288Cfs*12 (driver)	no alteration	no alteration	no alteration	no alteration	no alteration	no alteration	no alteration	no alteration	no alteration	no alteration	no alteration	no alteration	no alteration	no alteration	no alteration	no alteration	no alteration	no alteration	no alteration	no alteration	no alteration	no alteration	no alteration	no alteration	no alteration	no alteration	no alteration	no alteration	no alteration	no alteration	no alteration	no alteration	no alteration	no alteration	no alteration	Y599_D600insEYEYEYEY (driver)	no alteration	no alteration	no alteration
laml_tcga_pan_can_atlas_2018	TCGA-AB-2977-03	TCGA-AB-2977	1	LOW	no alteration	no alteration	no alteration	no alteration	no alteration	no alteration	no alteration	R132C (driver)	no alteration	no alteration	LOW	no alteration	no alteration	no alteration	no alteration	LOW	LOW	no alteration	no alteration	no alteration	no alteration	no alteration	no alteration	no alteration	no alteration	no alteration	no alteration	no alteration	no alteration	no alteration	no alteration	no alteration	no alteration	no alteration	no alteration	no alteration	no alteration	no alteration	no alteration	no alteration	no alteration	no alteration	no alteration	no alteration	no alteration
laml_tcga_pan_can_atlas_2018	TCGA-AB-2978-03	TCGA-AB-2978	1	no alteration	no alteration	no alteration	no alteration	no alteration	no alteration	no alteration	no alteration	no alteration	no alteration	R201* (driver)	R1516* (driver), X1348_splice (driver)	no alteration	no alteration	no alteration	no alteration	no alteration	no alteration	no alteration	no alteration	no alteration	no alteration	no alteration	no alteration	no alteration	no alteration	no alteration	no alteration	no alteration	no alteration	no alteration	no alteration	no alteration	no alteration	no alteration	no alteration	no alteration	no alteration	no alteration	no alteration	no alteration	no alteration	no alteration	no alteration	no alteration	no alteration
laml_tcga_pan_can_atlas_2018	TCGA-AB-2979-03	TCGA-AB-2979	1	no alteration	LOW	no alteration	no alteration	no alteration	no alteration	no alteration	no alteration	no alteration	HIGH	no alteration	no alteration	no alteration	no alteration	not profiled	not profiled	no alteration	no alteration	no alteration	no alteration	not profiled	not profiled	LOW	LOW	no alteration	no alteration	not profiled	not profiled	no alteration	no alteration	no alteration	no alteration	not profiled	not profiled	no alteration	no alteration	no alteration	no alteration	not profiled	not profiled	no alteration	no alteration	no alteration	no alteration	not profiled	not profiled
laml_tcga_pan_can_atlas_2018	TCGA-AB-2980-03	TCGA-AB-2980	1	no alteration	no alteration	no alteration	no alteration	no alteration	F594_D600dup (driver)	no alteration	no alteration	no alteration	no alteration	no alteration	no alteration	no alteration	no alteration	no alteration	no alteration	no alteration	no alteration	no alteration	no alteration	no alteration	no alteration	no alteration	no alteration	no alteration	no alteration	no alteration	no alteration	no alteration	no alteration	no alteration	no alteration	no alteration	no alteration	no alteration	no alteration	no alteration	no alteration	no alteration	no alteration	no alteration	no alteration	F594_D600dup (driver)	no alteration	no alteration	no alteration
laml_tcga_pan_can_atlas_2018	TCGA-AB-2981-03	TCGA-AB-2981	1	no alteration	no alteration	no alteration	no alteration	no alteration	T582delinsMAGSSDNEYFYVDFREYES (driver)	W288Cfs*12 (driver), LOW	R882C (driver)	no alteration	no alteration	no alteration	no alteration	no alteration	no alteration	not profiled	not profiled	no alteration	no alteration	no alteration	no alteration	not profiled	not profiled	no alteration	no alteration	no alteration	no alteration	not profiled	not profiled	no alteration	no alteration	no alteration	no alteration	not profiled	not profiled	no alteration	no alteration	no alteration	no alteration	not profiled	not profiled	no alteration	no alteration	T582delinsMAGSSDNEYFYVDFREYES (driver)	no alteration	not profiled	not profiled
laml_tcga_pan_can_atlas_2018	TCGA-AB-2982-03	TCGA-AB-2982	1	HIGH	no alteration	HIGH	no alteration	no alteration	no alteration	no alteration	no alteration	no alteration	no alteration	no alteration	no alteration	no alteration	no alteration	no alteration	no alteration	HIGH	HIGH	no alteration	no alteration	no alteration	no alteration	no alteration	no alteration	no alteration	no alteration	no alteration	no alteration	HIGH	HIGH	no alteration	no alteration	no alteration	no alteration	no alteration	no alteration	no alteration	no alteration	no alteration	no alteration	no alteration	no alteration	no alteration	no alteration	no alteration	no alteration
laml_tcga_pan_can_atlas_2018	TCGA-AB-2983-03	TCGA-AB-2983	1	no alteration	no alteration	no alteration	no alteration	no alteration	no alteration	no alteration	no alteration	no alteration	no alteration	A149P	no alteration	no alteration	no alteration	no alteration	no alteration	no alteration	no alteration	no alteration	no alteration	no alteration	no alteration	no alteration	no alteration	no alteration	no alteration	no alteration	no alteration	no alteration	no alteration	no alteration	no alteration	no alteration	no alteration	no alteration	no alteration	no alteration	no alteration	no alteration	no alteration	no alteration	no alteration	no alteration	no alteration	no alteration	no alteration
laml_tcga_pan_can_atlas_2018	TCGA-AB-2984-03	TCGA-AB-2984	1	no alteration	HIGH	no alteration	no alteration	no alteration	no alteration	W288Cfs*12 (driver)	no alteration	R132C (driver)	no alteration	HIGH	no alteration	no alteration	no alteration	no alteration	no alteration	no alteration	no alteration	no alteration	no alteration	no alteration	no alteration	HIGH	HIGH	no alteration	no alteration	no alteration	no alteration	no alteration	no alteration	no alteration	no alteration	no alteration	no alteration	no alteration	no alteration	no alteration	no alteration	no alteration	no alteration	no alteration	no alteration	no alteration	no alteration	no alteration	no alteration
laml_tcga_pan_can_atlas_2018	TCGA-AB-2985-03	TCGA-AB-2985	1	no alteration	no alteration	no alteration	LOW	no alteration	no alteration	no alteration	no alteration	no alteration	no alteration	LOW	no alteration	no alteration	no alteration	no alteration	no alteration	no alteration	no alteration	no alteration	no alteration	no alteration	no alteration	no alteration	no alteration	no alteration	no alteration	no alteration	no alteration	no alteration	no alteration	no alteration	no alteration	no alteration	no alteration	LOW	LOW	no alteration	no alteration	no alteration	no alteration	no alteration	no alteration	no alteration	no alteration	no alteration	no alteration
laml_tcga_pan_can_atlas_2018	TCGA-AB-2986-03	TCGA-AB-2986	1	LOW	no alteration	no alteration	no alteration	no alteration	Y597_E598insAGSSDNEYFYVDFREY (driver)	W288Cfs*12 (driver), HIGH	no alteration	no alteration	no alteration	no alteration	no alteration	no alteration	no alteration	no alteration	no alteration	LOW	LOW	no alteration	no alteration	no alteration	no alteration	no alteration	no alteration	no alteration	no alteration	no alteration	no alteration	no alteration	no alteration	no alteration	no alteration	no alteration	no alteration	no alteration	no alteration	no alteration	no alteration	no alteration	no alteration	no alteration	no alteration	Y597_E598insAGSSDNEYFYVDFREY (driver)	no alteration	no alteration	no alteration
laml_tcga_pan_can_atlas_2018	TCGA-AB-2987-03	TCGA-AB-2987	1	no alteration	no alteration	no alteration	HIGH	no alteration	LOW	W288Cfs*12 (driver)	R882H (driver)	no alteration	no alteration	no alteration	no alteration	no alteration	no alteration	no alteration	no alteration	no alteration	no alteration	no alteration	no alteration	no alteration	no alteration	no alteration	no alteration	no alteration	no alteration	no alteration	no alteration	no alteration	no alteration	no alteration	no alteration	no alteration	no alteration	HIGH	HIGH	no alteration	no alteration	no alteration	no alteration	no alteration	no alteration	no alteration	no alteration	no alteration	no alteration
laml_tcga_pan_can_atlas_2018	TCGA-AB-2988-03	TCGA-AB-2988	1	no alteration	no alteration	no alteration	no alteration	no alteration	X602_splice	W288Cfs*12 (driver)	F909C (driver)	no alteration	no alteration	no alteration	no alteration	no alteration	no alteration	no alteration	no alteration	no alteration	no alteration	no alteration	no alteration	no alteration	no alteration	no alteration	no alteration	no alteration	no alteration	no alteration	no alteration	no alteration	no alteration	no alteration	no alteration	no alteration	no alteration	no alteration	no alteration	no alteration	no alteration	no alteration	no alteration	no alteration	no alteration	X602_splice	no alteration	no alteration	no alteration
laml_tcga_pan_can_atlas_2018	TCGA-AB-2989-03	TCGA-AB-2989	1	no alteration	no alteration	no alteration	no alteration	no alteration	no alteration	W288Cfs*12 (driver)	no alteration	no alteration	no alteration	no alteration	no alteration	no alteration	no alteration	no alteration	no alteration	not profiled	not profiled	no alteration	no alteration	no alteration	no alteration	not profiled	not profiled	no alteration	no alteration	no alteration	no alteration	not profiled	not profiled	no alteration	no alteration	no alteration	no alteration	not profiled	not profiled	no alteration	no alteration	no alteration	no alteration	not profiled	not profiled	no alteration	no alteration	no alteration	no alteration
laml_tcga_pan_can_atlas_2018	TCGA-AB-2990-03	TCGA-AB-2990	1	no alteration	no alteration	no alteration	no alteration	no alteration	ANKRD28-FLT3 fusion	W288Cfs*12 (driver)	no alteration	R132G (driver)	no alteration	no alteration	no alteration	no alteration	no alteration	no alteration	no alteration	no alteration	no alteration	no alteration	no alteration	no alteration	no alteration	no alteration	no alteration	no alteration	no alteration	no alteration	no alteration	no alteration	no alteration	no alteration	no alteration	no alteration	no alteration	no alteration	no alteration	no alteration	no alteration	no alteration	no alteration	no alteration	no alteration	no alteration	ANKRD28-FLT3 fusion	no alteration	no alteration
laml_tcga_pan_can_atlas_2018	TCGA-AB-2991-03	TCGA-AB-2991	1	no alteration	no alteration	no alteration	no alteration	no alteration	no alteration	no alteration	no alteration	LOW	no alteration	no alteration	no alteration	no alteration	no alteration	no alteration	no alteration	no alteration	no alteration	no alteration	no alteration	no alteration	no alteration	no alteration	no alteration	no alteration	no alteration	no alteration	no alteration	no alteration	no alteration	no alteration	no alteration	no alteration	no alteration	no alteration	no alteration	no alteration	no alteration	no alteration	no alteration	no alteration	no alteration	no alteration	no alteration	no alteration	no alteration
laml_tcga_pan_can_atlas_2018	TCGA-AB-2992-03	TCGA-AB-2992	1	no alteration	no alteration	no alteration	no alteration	no alteration	no alteration	W288Cfs*12 (driver)	no alteration	R132C (driver)	no alteration	no alteration	no alteration	no alteration	no alteration	no alteration	no alteration	no alteration	no alteration	no alteration	no alteration	no alteration	no alteration	no alteration	no alteration	no alteration	no alteration	no alteration	no alteration	no alteration	no alteration	no alteration	no alteration	no alteration	no alteration	no alteration	no alteration	no alteration	no alteration	no alteration	no alteration	no alteration	no alteration	no alteration	no alteration	no alteration	no alteration
laml_tcga_pan_can_atlas_2018	TCGA-AB-2993-03	TCGA-AB-2993	1	no alteration	no alteration	no alteration	no alteration	no alteration	S585_F594dup (driver)	W288Cfs*12 (driver)	L723Pfs*56 (driver)	no alteration	no alteration	no alteration	no alteration	no alteration	no alteration	no alteration	no alteration	no alteration	no alteration	no alteration	no alteration	no alteration	no alteration	no alteration	no alteration	no alteration	no alteration	no alteration	no alteration	no alteration	no alteration	no alteration	no alteration	no alteration	no alteration	no alteration	no alteration	no alteration	no alteration	no alteration	no alteration	no alteration	no alteration	S585_F594dup (driver)	no alteration	no alteration	no alteration
laml_tcga_pan_can_atlas_2018	TCGA-AB-2994-03	TCGA-AB-2994	1	no alteration	HIGH	no alteration	no alteration	no alteration	F594_D600dup (driver)	LOW	no alteration	no alteration	no alteration	no alteration	no alteration	no alteration	no alteration	no alteration	no alteration	no alteration	no alteration	no alteration	no alteration	no alteration	no alteration	HIGH	HIGH	no alteration	no alteration	no alteration	no alteration	no alteration	no alteration	no alteration	no alteration	no alteration	no alteration	no alteration	no alteration	no alteration	no alteration	no alteration	no alteration	no alteration	no alteration	F594_D600dup (driver)	no alteration	no alteration	no alteration
laml_tcga_pan_can_atlas_2018	TCGA-AB-2996-03	TCGA-AB-2996	1	no alteration	no alteration	no alteration	no alteration	no alteration	no alteration	no alteration	no alteration	no alteration	no alteration	no alteration	R1354Sfs*46 (driver), H1868Y	no alteration	no alteration	no alteration	no alteration	no alteration	no alteration	no alteration	no alteration	no alteration	no alteration	no alteration	no alteration	no alteration	no alteration	no alteration	no alteration	no alteration	no alteration	no alteration	no alteration	no alteration	no alteration	no alteration	no alteration	no alteration	no alteration	no alteration	no alteration	no alteration	no alteration	no alteration	no alteration	no alteration	no alteration
laml_tcga_pan_can_atlas_2018	TCGA-AB-2998-03	TCGA-AB-2998	1	HIGH	no alteration	no alteration	no alteration	no alteration	F594_D600dup (driver)	no alteration	no alteration	no alteration	no alteration	no alteration	no alteration	no alteration	no alteration	no alteration	no alteration	HIGH	HIGH	no alteration	no alteration	no alteration	no alteration	no alteration	no alteration	no alteration	no alteration	no alteration	no alteration	no alteration	no alteration	no alteration	no alteration	no alteration	no alteration	no alteration	no alteration	no alteration	no alteration	no alteration	no alteration	no alteration	no alteration	F594_D600dup (driver)	no alteration	no alteration	no alteration
laml_tcga_pan_can_atlas_2018	TCGA-AB-2999-03	TCGA-AB-2999	1	no alteration	HIGH	HIGH	no alteration	no alteration	no alteration	no alteration	no alteration	no alteration	no alteration	no alteration	no alteration	no alteration	no alteration	no alteration	no alteration	no alteration	no alteration	no alteration	no alteration	no alteration	no alteration	HIGH	HIGH	no alteration	no alteration	no alteration	no alteration	HIGH	HIGH	no alteration	no alteration	no alteration	no alteration	no alteration	no alteration	no alteration	no alteration	no alteration	no alteration	no alteration	no alteration	no alteration	no alteration	no alteration	no alteration
laml_tcga_pan_can_atlas_2018	TCGA-AB-3000-03	TCGA-AB-3000	1	no alteration	no alteration	no alteration	no alteration	no alteration	no alteration	no alteration	no alteration	no alteration	no alteration	LOW	no alteration	no alteration	no alteration	no alteration	no alteration	no alteration	no alteration	no alteration	no alteration	no alteration	no alteration	no alteration	no alteration	no alteration	no alteration	no alteration	no alteration	no alteration	no alteration	no alteration	no alteration	no alteration	no alteration	no alteration	no alteration	no alteration	no alteration	no alteration	no alteration	no alteration	no alteration	no alteration	no alteration	no alteration	no alteration
laml_tcga_pan_can_atlas_2018	TCGA-AB-3001-03	TCGA-AB-3001	1	no alteration	HIGH	HIGH	no alteration	no alteration	no alteration	no alteration	no alteration	no alteration	no alteration	no alteration	no alteration	no alteration	no alteration	no alteration	no alteration	no alteration	no alteration	no alteration	no alteration	no alteration	no alteration	HIGH	HIGH	no alteration	no alteration	no alteration	no alteration	HIGH	HIGH	no alteration	no alteration	no alteration	no alteration	no alteration	no alteration	no alteration	no alteration	no alteration	no alteration	no alteration	no alteration	no alteration	no alteration	no alteration	no alteration
laml_tcga_pan_can_atlas_2018	TCGA-AB-3002-03	TCGA-AB-3002	1	no alteration	no alteration	no alteration	no alteration	no alteration	no alteration	no alteration	no alteration	no alteration	R140L (driver)	no alteration	no alteration	no alteration	no alteration	no alteration	no alteration	no alteration	no alteration	no alteration	no alteration	no alteration	no alteration	no alteration	no alteration	no alteration	no alteration	no alteration	no alteration	no alteration	no alteration	no alteration	no alteration	no alteration	no alteration	no alteration	no alteration	no alteration	no alteration	no alteration	no alteration	no alteration	no alteration	no alteration	no alteration	no alteration	no alteration
laml_tcga_pan_can_atlas_2018	TCGA-AB-3005-03	TCGA-AB-3005	1	no alteration	no alteration	no alteration	no alteration	no alteration	no alteration	no alteration	no alteration	no alteration	no alteration	LOW	no alteration	no alteration	no alteration	no alteration	no alteration	no alteration	no alteration	no alteration	no alteration	no alteration	no alteration	no alteration	no alteration	no alteration	no alteration	no alteration	no alteration	no alteration	no alteration	no alteration	no alteration	no alteration	no alteration	no alteration	no alteration	no alteration	no alteration	no alteration	no alteration	no alteration	no alteration	no alteration	no alteration	no alteration	no alteration
laml_tcga_pan_can_atlas_2018	TCGA-AB-3006-03	TCGA-AB-3006	1	HIGH	no alteration	no alteration	no alteration	no alteration	Y597_E598insDEYFYVDFREY (driver)	no alteration	no alteration	no alteration	no alteration	no alteration	R1452* (driver)	no alteration	no alteration	no alteration	no alteration	HIGH	HIGH	no alteration	no alteration	no alteration	no alteration	no alteration	no alteration	no alteration	no alteration	no alteration	no alteration	no alteration	no alteration	no alteration	no alteration	no alteration	no alteration	no alteration	no alteration	no alteration	no alteration	no alteration	no alteration	no alteration	no alteration	Y597_E598insDEYFYVDFREY (driver)	no alteration	no alteration	no alteration
laml_tcga_pan_can_atlas_2018	TCGA-AB-3007-03	TCGA-AB-3007	1	HIGH	no alteration	no alteration	LOW	no alteration	F594_D600dup (driver)	no alteration	no alteration	no alteration	no alteration	no alteration	no alteration	no alteration	no alteration	no alteration	no alteration	HIGH	HIGH	no alteration	no alteration	no alteration	no alteration	no alteration	no alteration	no alteration	no alteration	no alteration	no alteration	no alteration	no alteration	no alteration	no alteration	no alteration	no alteration	LOW	LOW	no alteration	no alteration	no alteration	no alteration	no alteration	no alteration	F594_D600dup (driver)	no alteration	no alteration	no alteration
laml_tcga_pan_can_atlas_2018	TCGA-AB-3008-03	TCGA-AB-3008	1	no alteration	LOW	no alteration	no alteration	no alteration	no alteration	no alteration	no alteration	no alteration	HIGH	no alteration	no alteration	no alteration	no alteration	no alteration	no alteration	no alteration	no alteration	no alteration	no alteration	no alteration	no alteration	LOW	LOW	no alteration	no alteration	no alteration	no alteration	no alteration	no alteration	no alteration	no alteration	no alteration	no alteration	no alteration	no alteration	no alteration	no alteration	no alteration	no alteration	no alteration	no alteration	no alteration	no alteration	no alteration	no alteration
laml_tcga_pan_can_atlas_2018	TCGA-AB-3009-03	TCGA-AB-3009	1	no alteration	HOMDEL	HIGH	no alteration	no alteration	no alteration	no alteration	no alteration	no alteration	no alteration	G165* (driver)	LOW	no alteration	no alteration	no alteration	no alteration	no alteration	no alteration	no alteration	no alteration	HOMDEL	HOMDEL	no alteration	no alteration	no alteration	no alteration	no alteration	no alteration	HIGH	HIGH	no alteration	no alteration	no alteration	no alteration	no alteration	no alteration	no alteration	no alteration	no alteration	no alteration	no alteration	no alteration	no alteration	no alteration	no alteration	no alteration
laml_tcga_pan_can_atlas_2018	TCGA-AB-3011-03	TCGA-AB-3011	1	no alteration	no alteration	no alteration	no alteration	no alteration	no alteration	W288Cfs*12 (driver)	no alteration	R132S (driver)	no alteration	no alteration	no alteration	no alteration	no alteration	no alteration	no alteration	no alteration	no alteration	no alteration	no alteration	no alteration	no alteration	no alteration	no alteration	no alteration	no alteration	no alteration	no alteration	no alteration	no alteration	no alteration	no alteration	no alteration	no alteration	no alteration	no alteration	no alteration	no alteration	no alteration	no alteration	no alteration	no alteration	no alteration	no alteration	no alteration	no alteration
laml_tcga_pan_can_atlas_2018	TCGA-AB-3012-03	TCGA-AB-3012	1	HIGH	no alteration	HIGH	LOW	no alteration	no alteration	no alteration	no alteration	no alteration	no alteration	no alteration	no alteration	no alteration	no alteration	no alteration	no alteration	HIGH	HIGH	no alteration	no alteration	no alteration	no alteration	no alteration	no alteration	no alteration	no alteration	no alteration	no alteration	HIGH	HIGH	no alteration	no alteration	no alteration	no alteration	LOW	LOW	no alteration	no alteration	no alteration	no alteration	no alteration	no alteration	no alteration	no alteration	no alteration	no alteration
laml_tcga_pan_can_atlas_2018	TCGA-AB-2804-03	TCGA-AB-2804	0	no alteration	no alteration	no alteration	no alteration	no alteration	no alteration	no alteration	no alteration	no alteration	no alteration	no alteration	no alteration	no alteration	no alteration	no alteration	no alteration	not profiled	not profiled	no alteration	no alteration	no alteration	no alteration	not profiled	not profiled	no alteration	no alteration	no alteration	no alteration	not profiled	not profiled	no alteration	no alteration	no alteration	no alteration	not profiled	not profiled	no alteration	no alteration	no alteration	no alteration	not profiled	not profiled	no alteration	no alteration	no alteration	no alteration
laml_tcga_pan_can_atlas_2018	TCGA-AB-2806-03	TCGA-AB-2806	0	no alteration	no alteration	no alteration	no alteration	no alteration	no alteration	no alteration	no alteration	no alteration	no alteration	no alteration	no alteration	no alteration	no alteration	no alteration	no alteration	no alteration	no alteration	no alteration	no alteration	no alteration	no alteration	no alteration	no alteration	no alteration	no alteration	no alteration	no alteration	no alteration	no alteration	no alteration	no alteration	no alteration	no alteration	no alteration	no alteration	no alteration	no alteration	no alteration	no alteration	no alteration	no alteration	no alteration	no alteration	no alteration	no alteration
laml_tcga_pan_can_atlas_2018	TCGA-AB-2815-03	TCGA-AB-2815	0	no alteration	no alteration	no alteration	no alteration	no alteration	no alteration	no alteration	no alteration	no alteration	no alteration	no alteration	no alteration	no alteration	no alteration	no alteration	no alteration	no alteration	no alteration	no alteration	no alteration	no alteration	no alteration	no alteration	no alteration	no alteration	no alteration	no alteration	no alteration	no alteration	no alteration	no alteration	no alteration	no alteration	no alteration	no alteration	no alteration	no alteration	no alteration	no alteration	no alteration	no alteration	no alteration	no alteration	no alteration	no alteration	no alteration
laml_tcga_pan_can_atlas_2018	TCGA-AB-2817-03	TCGA-AB-2817	0	no alteration	no alteration	no alteration	no alteration	no alteration	no alteration	no alteration	no alteration	no alteration	no alteration	no alteration	no alteration	no alteration	no alteration	no alteration	no alteration	no alteration	no alteration	no alteration	no alteration	no alteration	no alteration	no alteration	no alteration	no alteration	no alteration	no alteration	no alteration	no alteration	no alteration	no alteration	no alteration	no alteration	no alteration	no alteration	no alteration	no alteration	no alteration	no alteration	no alteration	no alteration	no alteration	no alteration	no alteration	no alteration	no alteration
laml_tcga_pan_can_atlas_2018	TCGA-AB-2823-03	TCGA-AB-2823	0	no alteration	no alteration	no alteration	no alteration	no alteration	no alteration	no alteration	no alteration	no alteration	no alteration	no alteration	no alteration	no alteration	no alteration	no alteration	no alteration	no alteration	no alteration	no alteration	no alteration	no alteration	no alteration	no alteration	no alteration	no alteration	no alteration	no alteration	no alteration	no alteration	no alteration	no alteration	no alteration	no alteration	no alteration	no alteration	no alteration	no alteration	no alteration	no alteration	no alteration	no alteration	no alteration	no alteration	no alteration	no alteration	no alteration
laml_tcga_pan_can_atlas_2018	TCGA-AB-2827-03	TCGA-AB-2827	0	no alteration	no alteration	no alteration	no alteration	no alteration	no alteration	no alteration	no alteration	no alteration	no alteration	no alteration	no alteration	no alteration	no alteration	no alteration	no alteration	not profiled	not profiled	no alteration	no alteration	no alteration	no alteration	not profiled	not profiled	no alteration	no alteration	no alteration	no alteration	not profiled	not profiled	no alteration	no alteration	no alteration	no alteration	not profiled	not profiled	no alteration	no alteration	no alteration	no alteration	not profiled	not profiled	no alteration	no alteration	no alteration	no alteration
laml_tcga_pan_can_atlas_2018	TCGA-AB-2828-03	TCGA-AB-2828	0	no alteration	no alteration	no alteration	no alteration	no alteration	no alteration	no alteration	no alteration	no alteration	no alteration	no alteration	no alteration	no alteration	no alteration	no alteration	no alteration	no alteration	no alteration	no alteration	no alteration	no alteration	no alteration	no alteration	no alteration	no alteration	no alteration	no alteration	no alteration	no alteration	no alteration	no alteration	no alteration	no alteration	no alteration	no alteration	no alteration	no alteration	no alteration	no alteration	no alteration	no alteration	no alteration	no alteration	no alteration	no alteration	no alteration
laml_tcga_pan_can_atlas_2018	TCGA-AB-2829-03	TCGA-AB-2829	0	no alteration	no alteration	no alteration	no alteration	no alteration	no alteration	no alteration	no alteration	no alteration	no alteration	no alteration	no alteration	no alteration	no alteration	no alteration	no alteration	not profiled	not profiled	no alteration	no alteration	no alteration	no alteration	not profiled	not profiled	no alteration	no alteration	no alteration	no alteration	not profiled	not profiled	no alteration	no alteration	no alteration	no alteration	not profiled	not profiled	no alteration	no alteration	no alteration	no alteration	not profiled	not profiled	no alteration	no alteration	no alteration	no alteration
laml_tcga_pan_can_atlas_2018	TCGA-AB-2831-03	TCGA-AB-2831	0	no alteration	no alteration	no alteration	no alteration	no alteration	no alteration	no alteration	no alteration	no alteration	no alteration	no alteration	no alteration	no alteration	no alteration	no alteration	no alteration	not profiled	not profiled	no alteration	no alteration	no alteration	no alteration	not profiled	not profiled	no alteration	no alteration	no alteration	no alteration	not profiled	not profiled	no alteration	no alteration	no alteration	no alteration	not profiled	not profiled	no alteration	no alteration	no alteration	no alteration	not profiled	not profiled	no alteration	no alteration	no alteration	no alteration
laml_tcga_pan_can_atlas_2018	TCGA-AB-2832-03	TCGA-AB-2832	0	no alteration	no alteration	no alteration	no alteration	no alteration	no alteration	no alteration	no alteration	no alteration	no alteration	no alteration	no alteration	no alteration	no alteration	no alteration	no alteration	no alteration	no alteration	no alteration	no alteration	no alteration	no alteration	no alteration	no alteration	no alteration	no alteration	no alteration	no alteration	no alteration	no alteration	no alteration	no alteration	no alteration	no alteration	no alteration	no alteration	no alteration	no alteration	no alteration	no alteration	no alteration	no alteration	no alteration	no alteration	no alteration	no alteration
laml_tcga_pan_can_atlas_2018	TCGA-AB-2843-03	TCGA-AB-2843	0	no alteration	no alteration	no alteration	no alteration	no alteration	no alteration	no alteration	no alteration	no alteration	no alteration	no alteration	no alteration	no alteration	no alteration	not profiled	not profiled	no alteration	no alteration	no alteration	no alteration	not profiled	not profiled	no alteration	no alteration	no alteration	no alteration	not profiled	not profiled	no alteration	no alteration	no alteration	no alteration	not profiled	not profiled	no alteration	no alteration	no alteration	no alteration	not profiled	not profiled	no alteration	no alteration	no alteration	no alteration	not profiled	not profiled
laml_tcga_pan_can_atlas_2018	TCGA-AB-2846-03	TCGA-AB-2846	0	no alteration	no alteration	no alteration	no alteration	no alteration	no alteration	no alteration	no alteration	no alteration	no alteration	no alteration	no alteration	no alteration	no alteration	no alteration	no alteration	no alteration	no alteration	no alteration	no alteration	no alteration	no alteration	no alteration	no alteration	no alteration	no alteration	no alteration	no alteration	no alteration	no alteration	no alteration	no alteration	no alteration	no alteration	no alteration	no alteration	no alteration	no alteration	no alteration	no alteration	no alteration	no alteration	no alteration	no alteration	no alteration	no alteration
laml_tcga_pan_can_atlas_2018	TCGA-AB-2847-03	TCGA-AB-2847	0	no alteration	no alteration	no alteration	no alteration	no alteration	no alteration	no alteration	no alteration	no alteration	no alteration	no alteration	no alteration	no alteration	no alteration	not profiled	not profiled	no alteration	no alteration	no alteration	no alteration	not profiled	not profiled	no alteration	no alteration	no alteration	no alteration	not profiled	not profiled	no alteration	no alteration	no alteration	no alteration	not profiled	not profiled	no alteration	no alteration	no alteration	no alteration	not profiled	not profiled	no alteration	no alteration	no alteration	no alteration	not profiled	not profiled
laml_tcga_pan_can_atlas_2018	TCGA-AB-2854-03	TCGA-AB-2854	0	no alteration	no alteration	no alteration	no alteration	no alteration	no alteration	no alteration	no alteration	no alteration	no alteration	no alteration	no alteration	no alteration	no alteration	no alteration	no alteration	no alteration	no alteration	no alteration	no alteration	no alteration	no alteration	no alteration	no alteration	no alteration	no alteration	no alteration	no alteration	no alteration	no alteration	no alteration	no alteration	no alteration	no alteration	no alteration	no alteration	no alteration	no alteration	no alteration	no alteration	no alteration	no alteration	no alteration	no alteration	no alteration	no alteration
laml_tcga_pan_can_atlas_2018	TCGA-AB-2856-03	TCGA-AB-2856	0	no alteration	no alteration	no alteration	no alteration	no alteration	no alteration	no alteration	no alteration	no alteration	no alteration	no alteration	no alteration	no alteration	no alteration	no alteration	no alteration	no alteration	no alteration	no alteration	no alteration	no alteration	no alteration	no alteration	no alteration	no alteration	no alteration	no alteration	no alteration	no alteration	no alteration	no alteration	no alteration	no alteration	no alteration	no alteration	no alteration	no alteration	no alteration	no alteration	no alteration	no alteration	no alteration	no alteration	no alteration	no alteration	no alteration
laml_tcga_pan_can_atlas_2018	TCGA-AB-2860-03	TCGA-AB-2860	0	no alteration	no alteration	no alteration	no alteration	no alteration	no alteration	no alteration	no alteration	no alteration	no alteration	no alteration	no alteration	no alteration	no alteration	no alteration	no alteration	no alteration	no alteration	no alteration	no alteration	no alteration	no alteration	no alteration	no alteration	no alteration	no alteration	no alteration	no alteration	no alteration	no alteration	no alteration	no alteration	no alteration	no alteration	no alteration	no alteration	no alteration	no alteration	no alteration	no alteration	no alteration	no alteration	no alteration	no alteration	no alteration	no alteration
laml_tcga_pan_can_atlas_2018	TCGA-AB-2878-03	TCGA-AB-2878	0	no alteration	no alteration	no alteration	no alteration	no alteration	no alteration	no alteration	no alteration	no alteration	no alteration	no alteration	no alteration	no alteration	no alteration	no alteration	no alteration	not profiled	not profiled	no alteration	no alteration	no alteration	no alteration	not profiled	not profiled	no alteration	no alteration	no alteration	no alteration	not profiled	not profiled	no alteration	no alteration	no alteration	no alteration	not profiled	not profiled	no alteration	no alteration	no alteration	no alteration	not profiled	not profiled	no alteration	no alteration	no alteration	no alteration
laml_tcga_pan_can_atlas_2018	TCGA-AB-2881-03	TCGA-AB-2881	0	no alteration	no alteration	no alteration	no alteration	no alteration	no alteration	no alteration	no alteration	no alteration	no alteration	no alteration	no alteration	no alteration	no alteration	no alteration	no alteration	no alteration	no alteration	no alteration	no alteration	no alteration	no alteration	no alteration	no alteration	no alteration	no alteration	no alteration	no alteration	no alteration	no alteration	no alteration	no alteration	no alteration	no alteration	no alteration	no alteration	no alteration	no alteration	no alteration	no alteration	no alteration	no alteration	no alteration	no alteration	no alteration	no alteration
laml_tcga_pan_can_atlas_2018	TCGA-AB-2883-03	TCGA-AB-2883	0	no alteration	no alteration	no alteration	no alteration	no alteration	no alteration	no alteration	no alteration	no alteration	no alteration	no alteration	no alteration	no alteration	no alteration	no alteration	no alteration	not profiled	not profiled	no alteration	no alteration	no alteration	no alteration	not profiled	not profiled	no alteration	no alteration	no alteration	no alteration	not profiled	not profiled	no alteration	no alteration	no alteration	no alteration	not profiled	not profiled	no alteration	no alteration	no alteration	no alteration	not profiled	not profiled	no alteration	no alteration	no alteration	no alteration
laml_tcga_pan_can_atlas_2018	TCGA-AB-2889-03	TCGA-AB-2889	0	no alteration	no alteration	no alteration	no alteration	no alteration	no alteration	no alteration	no alteration	no alteration	no alteration	no alteration	no alteration	no alteration	no alteration	no alteration	no alteration	no alteration	no alteration	no alteration	no alteration	no alteration	no alteration	no alteration	no alteration	no alteration	no alteration	no alteration	no alteration	no alteration	no alteration	no alteration	no alteration	no alteration	no alteration	no alteration	no alteration	no alteration	no alteration	no alteration	no alteration	no alteration	no alteration	no alteration	no alteration	no alteration	no alteration
laml_tcga_pan_can_atlas_2018	TCGA-AB-2892-03	TCGA-AB-2892	0	no alteration	no alteration	no alteration	no alteration	no alteration	no alteration	no alteration	no alteration	no alteration	no alteration	no alteration	no alteration	no alteration	no alteration	no alteration	no alteration	not profiled	not profiled	no alteration	no alteration	no alteration	no alteration	not profiled	not profiled	no alteration	no alteration	no alteration	no alteration	not profiled	not profiled	no alteration	no alteration	no alteration	no alteration	not profiled	not profiled	no alteration	no alteration	no alteration	no alteration	not profiled	not profiled	no alteration	no alteration	no alteration	no alteration
laml_tcga_pan_can_atlas_2018	TCGA-AB-2893-03	TCGA-AB-2893	0	no alteration	no alteration	no alteration	no alteration	no alteration	no alteration	no alteration	no alteration	no alteration	no alteration	no alteration	no alteration	no alteration	no alteration	no alteration	no alteration	not profiled	not profiled	no alteration	no alteration	no alteration	no alteration	not profiled	not profiled	no alteration	no alteration	no alteration	no alteration	not profiled	not profiled	no alteration	no alteration	no alteration	no alteration	not profiled	not profiled	no alteration	no alteration	no alteration	no alteration	not profiled	not profiled	no alteration	no alteration	no alteration	no alteration
laml_tcga_pan_can_atlas_2018	TCGA-AB-2894-03	TCGA-AB-2894	0	no alteration	no alteration	no alteration	no alteration	no alteration	no alteration	no alteration	no alteration	no alteration	no alteration	no alteration	no alteration	no alteration	no alteration	no alteration	no alteration	not profiled	not profiled	no alteration	no alteration	no alteration	no alteration	not profiled	not profiled	no alteration	no alteration	no alteration	no alteration	not profiled	not profiled	no alteration	no alteration	no alteration	no alteration	not profiled	not profiled	no alteration	no alteration	no alteration	no alteration	not profiled	not profiled	no alteration	no alteration	no alteration	no alteration
laml_tcga_pan_can_atlas_2018	TCGA-AB-2904-03	TCGA-AB-2904	0	no alteration	no alteration	no alteration	no alteration	no alteration	no alteration	no alteration	no alteration	no alteration	no alteration	no alteration	no alteration	no alteration	no alteration	no alteration	no alteration	no alteration	no alteration	no alteration	no alteration	no alteration	no alteration	no alteration	no alteration	no alteration	no alteration	no alteration	no alteration	no alteration	no alteration	no alteration	no alteration	no alteration	no alteration	no alteration	no alteration	no alteration	no alteration	no alteration	no alteration	no alteration	no alteration	no alteration	no alteration	no alteration	no alteration
laml_tcga_pan_can_atlas_2018	TCGA-AB-2905-03	TCGA-AB-2905	0	no alteration	no alteration	no alteration	no alteration	no alteration	no alteration	no alteration	no alteration	no alteration	no alteration	no alteration	no alteration	no alteration	no alteration	no alteration	no alteration	not profiled	not profiled	no alteration	no alteration	no alteration	no alteration	not profiled	not profiled	no alteration	no alteration	no alteration	no alteration	not profiled	not profiled	no alteration	no alteration	no alteration	no alteration	not profiled	not profiled	no alteration	no alteration	no alteration	no alteration	not profiled	not profiled	no alteration	no alteration	no alteration	no alteration
laml_tcga_pan_can_atlas_2018	TCGA-AB-2911-03	TCGA-AB-2911	0	no alteration	no alteration	no alteration	no alteration	no alteration	no alteration	no alteration	no alteration	no alteration	no alteration	no alteration	no alteration	no alteration	no alteration	no alteration	no alteration	no alteration	no alteration	no alteration	no alteration	no alteration	no alteration	no alteration	no alteration	no alteration	no alteration	no alteration	no alteration	no alteration	no alteration	no alteration	no alteration	no alteration	no alteration	no alteration	no alteration	no alteration	no alteration	no alteration	no alteration	no alteration	no alteration	no alteration	no alteration	no alteration	no alteration
laml_tcga_pan_can_atlas_2018	TCGA-AB-2914-03	TCGA-AB-2914	0	no alteration	no alteration	no alteration	no alteration	no alteration	no alteration	no alteration	no alteration	no alteration	no alteration	no alteration	no alteration	no alteration	no alteration	no alteration	no alteration	no alteration	no alteration	no alteration	no alteration	no alteration	no alteration	no alteration	no alteration	no alteration	no alteration	no alteration	no alteration	no alteration	no alteration	no alteration	no alteration	no alteration	no alteration	no alteration	no alteration	no alteration	no alteration	no alteration	no alteration	no alteration	no alteration	no alteration	no alteration	no alteration	no alteration
laml_tcga_pan_can_atlas_2018	TCGA-AB-2917-03	TCGA-AB-2917	0	no alteration	no alteration	no alteration	no alteration	no alteration	no alteration	no alteration	no alteration	no alteration	no alteration	no alteration	no alteration	no alteration	no alteration	no alteration	no alteration	no alteration	no alteration	no alteration	no alteration	no alteration	no alteration	no alteration	no alteration	no alteration	no alteration	no alteration	no alteration	no alteration	no alteration	no alteration	no alteration	no alteration	no alteration	no alteration	no alteration	no alteration	no alteration	no alteration	no alteration	no alteration	no alteration	no alteration	no alteration	no alteration	no alteration
laml_tcga_pan_can_atlas_2018	TCGA-AB-2935-03	TCGA-AB-2935	0	no alteration	no alteration	no alteration	no alteration	no alteration	no alteration	no alteration	no alteration	no alteration	no alteration	no alteration	no alteration	no alteration	no alteration	no alteration	no alteration	no alteration	no alteration	no alteration	no alteration	no alteration	no alteration	no alteration	no alteration	no alteration	no alteration	no alteration	no alteration	no alteration	no alteration	no alteration	no alteration	no alteration	no alteration	no alteration	no alteration	no alteration	no alteration	no alteration	no alteration	no alteration	no alteration	no alteration	no alteration	no alteration	no alteration
laml_tcga_pan_can_atlas_2018	TCGA-AB-2940-03	TCGA-AB-2940	0	no alteration	no alteration	no alteration	no alteration	no alteration	no alteration	no alteration	no alteration	no alteration	no alteration	no alteration	no alteration	no alteration	no alteration	no alteration	no alteration	no alteration	no alteration	no alteration	no alteration	no alteration	no alteration	no alteration	no alteration	no alteration	no alteration	no alteration	no alteration	no alteration	no alteration	no alteration	no alteration	no alteration	no alteration	no alteration	no alteration	no alteration	no alteration	no alteration	no alteration	no alteration	no alteration	no alteration	no alteration	no alteration	no alteration
laml_tcga_pan_can_atlas_2018	TCGA-AB-2943-03	TCGA-AB-2943	0	no alteration	no alteration	no alteration	no alteration	no alteration	no alteration	no alteration	no alteration	no alteration	no alteration	no alteration	no alteration	no alteration	no alteration	no alteration	no alteration	no alteration	no alteration	no alteration	no alteration	no alteration	no alteration	no alteration	no alteration	no alteration	no alteration	no alteration	no alteration	no alteration	no alteration	no alteration	no alteration	no alteration	no alteration	no alteration	no alteration	no alteration	no alteration	no alteration	no alteration	no alteration	no alteration	no alteration	no alteration	no alteration	no alteration
laml_tcga_pan_can_atlas_2018	TCGA-AB-2944-03	TCGA-AB-2944	0	no alteration	no alteration	no alteration	no alteration	no alteration	no alteration	no alteration	no alteration	no alteration	no alteration	no alteration	no alteration	no alteration	no alteration	no alteration	no alteration	no alteration	no alteration	no alteration	no alteration	no alteration	no alteration	no alteration	no alteration	no alteration	no alteration	no alteration	no alteration	no alteration	no alteration	no alteration	no alteration	no alteration	no alteration	no alteration	no alteration	no alteration	no alteration	no alteration	no alteration	no alteration	no alteration	no alteration	no alteration	no alteration	no alteration
laml_tcga_pan_can_atlas_2018	TCGA-AB-2995-03	TCGA-AB-2995	0	no alteration	no alteration	no alteration	no alteration	no alteration	no alteration	no alteration	no alteration	no alteration	no alteration	no alteration	no alteration	no alteration	no alteration	no alteration	no alteration	no alteration	no alteration	no alteration	no alteration	no alteration	no alteration	no alteration	no alteration	no alteration	no alteration	no alteration	no alteration	no alteration	no alteration	no alteration	no alteration	no alteration	no alteration	no alteration	no alteration	no alteration	no alteration	no alteration	no alteration	no alteration	no alteration	no alteration	no alteration	no alteration	no alteration
laml_tcga_pan_can_atlas_2018	TCGA-AB-2997-03	TCGA-AB-2997	0	no alteration	no alteration	no alteration	no alteration	no alteration	no alteration	no alteration	no alteration	no alteration	no alteration	no alteration	no alteration	no alteration	no alteration	no alteration	no alteration	not profiled	not profiled	no alteration	no alteration	no alteration	no alteration	not profiled	not profiled	no alteration	no alteration	no alteration	no alteration	not profiled	not profiled	no alteration	no alteration	no alteration	no alteration	not profiled	not profiled	no alteration	no alteration	no alteration	no alteration	not profiled	not profiled	no alteration	no alteration	no alteration	no alteration
[truncated: 38 more columns]
